1                    ***Caenorhabditis elegans* locomotion is affected**  
2                    **by internalized paramagnetic nanoparticles in the presence of**  
3                    **magnetic field**

4  
5                    Eleni Gourgou<sup>1,2,\*</sup>, Yang Zhang<sup>3,4,\*\*</sup>, Ehsan Mirzakhali<sup>1,\*\*\*</sup>, Bogdan Epureanu<sup>1,+</sup>

6  
7                    <sup>1</sup> Mechanical Engineering, University of Michigan, Ann Arbor, Michigan

8                    <sup>2</sup> Internal Medicine, Division of Geriatrics and Palliative Medicine, Medical School, University of  
9 Michigan, Ann Arbor, Michigan

10                    <sup>3</sup> Electrical Engineering and Computer Science, University of Michigan, Ann Arbor, Michigan

11                    <sup>4</sup> University of Michigan and Shanghai Jiao Tong University Joint Institution, Shanghai, China

12                    \* present address: Mechanical Engineering, University of Michigan, Ann Arbor, Michigan

13                    \*\* present address: Robotics System Development, Carnegie Mellon University, Pittsburg,  
14 Pennsylvania

15                    \*\*\* present address: Biomedical Engineering, University of Michigan, Ann Arbor, Michigan

16  
17                    + corresponding author: Bogdan Epureanu

18                    Email: epureanu@umich.edu

19  
20                    **Running Title:** nanoparticles *C. elegans* locomotion

21  
22                    **Keywords:** *C. elegans*; nanoparticles; magnetic field gradient; locomotion; paramagnetic

23  
24  
25  
26  
27  
28  
29  
30  
31  
32  
33

## 34 **Summary Statement**

35 *C. elegans* with internalized paramagnetic nanoparticles are placed inside magnetic field to  
36 explore effects on locomotion. Results support the potential of *C. elegans* to investigate the impact  
37 of the above environmental factors on behavior.

38

39

## 40 **Abstract**

41 *C. elegans* nematodes are a model organism used broadly to investigate the impact of  
42 environmental factors on physiology and behavior. Here, *C. elegans* with internalized  
43 paramagnetic nanoparticles were placed inside magnetic field to explore effects on locomotion.  
44 We hypothesize that internalized paramagnetic nanoparticles combined with external magnetic  
45 field affect *C. elegans*' locomotion machinery. To test our hypothesis, we used young adult *C.*  
46 *elegans* fed on bacteria mixed with paramagnetic nanoparticles of 1  $\mu\text{m}$ , 100 nm and 40 nm  
47 diameter. The presence of nanoparticles inside the worms' body (alimentary canal, body muscle)  
48 was verified by fluorescent and electron microscopy. A custom-made software was used to track  
49 freely moving *C. elegans* in the absence or presence of magnetic field sequentially for 200+200  
50 sec. We used established metrics to quantify locomotion-related parameters, including posture,  
51 motion and path features. Key features of *C. elegans* locomotion (increased body bends and stay  
52 ratio, decreased range, forward movement, and speed along the magnetic field) were affected in  
53 worms with internalized nanoparticles of 100 nm and 1  $\mu\text{m}$  in the presence of magnetic field, in  
54 contrast to untreated worms. Our work contributes on clarifying the effect of internalized  
55 paramagnetic nanoparticles, combined with magnetic field, on *C. elegans* locomotion.

56

57

58

59

## 60 **Introduction**

61 The effects of magnetic field (MF) on living organisms have been a target of numerous  
62 research efforts, with their number increasing significantly during the last decades (Ghodbane et  
63 al., 2013; Hong, 1995; Shaw et al., 2015). In addition to the interest scientific community shows  
64 on the effect of alternating MF on cells (Ueno et al., 1986; Öcal, 2008; Belova and Acosta-Avalos,  
65 2015), static MF effects have gained attention also (Miyakoshi, 2005; Teodori et al., 2002) mainly  
66 due to their correlation with activity linked to the modern way of living (Lewczuk, 2014). The type  
67 of MF least studied in regard to cells is high-gradient MF. Recent work provides the theoretical

68 framework for the possible impact of high-gradient MF of various sources on cells' molecular  
69 components and function (Zablotskii et al., 2016).

70 Model organisms have been a successful resource to study MF effects on various types  
71 of cells and tissues (Osipova et al., 2016; Shcherbakov et al.; Malkemper et al., 2015; Kumari et  
72 al., 2017). Invertebrate models, like *Drosophila melanogaster*, have been used since the 80's  
73 (Fedele et al., 2014; Naito et al., 2012; Ramirez et al., 1983; Kale and Baum, 1980; Bae et al.,  
74 2016; Giachello et al., 2016). Interestingly, even though the nematode *C. elegans* has been an  
75 emblematic model organism to study the impact of a plethora of stimuli and environmental factors  
76 on behavior and physiology (Cheung et al., 2005; De Bono and Bargmann, 1998; Liedtke et al.,  
77 2003; Hedgecock and Russell, 1975; Ward et al., 2008), only recently it has been used in MF  
78 related work (Vidal-Gadea, 2015; Njus, 2015; Long et al., 2015; Wang et al., 2015; Lee et al.,  
79 2010), in which the first animal magnetosensory neurons were identified (Vidal-Gadea, 2015).  
80 The presence of biogenic magnetite has also been reported in *C. elegans* (Cranfield et al., 2004).

81 Nanoparticles uptake by *C. elegans* worms has been a successful means to evaluate  
82 toxicity of heavy metals and pollutants (Khare et al., 2011; Meyer et al., 2010; Kim et al., 2017),  
83 and the importance of *C. elegans* as a model system for *in vivo* nanoparticle assessment has  
84 been specifically highlighted (Gonzalez-Moragas et al., 2015a). Worms' behavior (Ma et al., 2009)  
85 and locomotion (Li et al., 2012; Wu et al., 2012) have been evaluated under the influence of  
86 internalized metal nanoparticles. In addition, magnetized nanoparticles have been used to  
87 activate ion channels in *C. elegans* through heating (Huang et al., 2010). However, only very  
88 recently internalized nanoparticles were used to locally enhance MF in the worms' body and study  
89 the subsequent impact on its metabolism (Wang et al., 2017).

90 *C. elegans* locomotion has been a major behavioral output used to investigate the impact  
91 of genetic background, environmental factors and diverse treatments on the worm's nervous  
92 system (Gourgou, 2016; Li et al., 2016; Liu, 2013; Hsu et al., 2009; Parida et al., 2014; Pierce-  
93 Shimomura et al., 2008). Locomotion features have been characterized and quantified extensively  
94 and are being used as an indicator of *C. elegans* physiological status and healthspan (Bansal et  
95 al., 2015; Shtonda and Avery, 2006; Peliti et al., 2013; Hahm et al., 2015). Therefore, locomotion  
96 is one of the first behaviors investigated to define whether *C. elegans* nematodes are sensitive to  
97 an environmental factor of interest.

98 The abovementioned scientific premises, the remaining need to clarify MF effects on  
99 animal physiology, and the increasing interest in the sensitivity of *C. elegans* to MF, indicate that  
100 the investigation of MF gradient effects on worms' behavior comes at a mature point. We  
101 hypothesize that internalized paramagnetic nanoparticles combined with external magnetic field

102 affect *C. elegans*' locomotive behavior. To test our hypothesis, we used internalized paramagnetic  
103 nanoparticles that can generate an effect inside the worms' body, in the closest possible proximity  
104 with tissues and cells. We used locomotion as a quantifiable and revealing behavioral expression  
105 to determine the effect of MF combined with the internalized nanoparticles. Our results  
106 demonstrate a response of *C. elegans* locomotion machinery to internalized paramagnetic  
107 nanoparticles in combination with MF gradients, and they pave the way for future studies seeking  
108 to clarify the participation of excitable cells, muscles and potentially even neurons, to this still  
109 uncharacterized behavior.

110

111

## 112 **Results**

### 113 **Magnetic field gradient characterization**

114 The simulation results for both electromagnets agreed with the experimental results  
115 provided by the manufacturer (Fig. S1). An overview of the MF around the electromagnets and  
116 the geometry of the model in COMSOL are presented in Figure 2A and a clear view of the MF on  
117 the plane of the worm plate surface is presented in Figure 2B. The arrows demonstrate the  
118 direction of the MF between the two electromagnets. The contours show that the MF is stronger  
119 near the electromagnets, as expected.

120 We focused on the features of the MF and the forces generated on the plate surface,  
121 where the worms' locomotion takes place. The MF was almost one-dimensional on the plate  
122 surface and was stronger nearer the electromagnets (Fig. 2C). There were 9 components for the  
123 gradient of the MF. In Figure 2D, the strongest component of the MF gradient is shown ( $B_{xx}$ ),  
124 which is parallel to  $x$  axis. The magnitude of the gradient was larger near the electromagnets.

125 The nanoparticles create secondary MFs in the presence of an external MF. Details on  
126 calculating the forces that were created by the particles used in the present study can be found  
127 in the Supplementary Information section. The magnitude of the MF flux was calculated in  
128 MATLAB using Eqs. [2] and [3] of Supplementary Information for configurations along the  $x$  and  
129  $y$  axes of three nanoparticles (as shown in Fig. 3A-3D). The MF was stronger close to the particles  
130 for both configurations and decayed rapidly as the distance from the particles increased (Fig. 3E).  
131 The force between the particles in the  $x$  direction was attractive, while the force between the  
132 particles in the  $y$  direction was repulsive. The attractive forces between the particles allow them  
133 to form chain-like structures, if they are not interrupted by the medium in which the particles are  
134 located (Mirzakhaili et al., 2017; Nakata et al., 2008). The magnetic moment of the external MF  
135 for the particles on the worm plate surface is depicted in Figure 3F.

136

### 137 **Confirmation of nanoparticles uptake and particle localization in *C. elegans*' body**

138 Nanoparticles mixed with bacterial food were successfully internalized, as verified by  
139 microscopy methods, selected according to the properties of each particle group (Fig. 4). The  
140 presence of 1  $\mu\text{m}$  paramagnetic particles (Table 1) in the worm's intestine and in the pharynx  
141 around the grinder area was verified by bright field microscopy. The particles appear as dark  
142 (copper-colored) objects accumulated in the alimentary canal (Fig. 4A, right panel), whereas  
143 control animals' intestine area appears transparent (Fig. 4A, left panel). Uptake of 100 nm  
144 fluorescent, paramagnetic particles (Table 1) was verified by fluorescent microscopy. The  
145 particles appear to accumulate along the intestine lumen and in the pharynx, as shown when  
146 filters for rhodamine, the fluorescent substance with which the particles were coated (see Table  
147 1 for particles properties), were used (Fig. 4B). Successful feeding on 40 nm paramagnetic  
148 particles (Table 1) was confirmed by scanning electron microscopy. As shown in Figure 4C, when  
149 using the circular backscatter (CBS) detector, 40 nm particles were visualized as white dots under  
150 the worm cuticle, in the broad area downstream of the pharynx and along the alimentary canal.  
151 The deformation of the sample due to the process followed allowed for obtaining only the  
152 approximate location of the particles. The white dots which represent the particles appear in  
153 different sizes, which might be attributed to particle aggregates or to the different depth at which  
154 the particles were located.

155 To investigate the particles localization in the worms' body, and to decipher whether they  
156 pass the intestine barrier, we used transmission electron microscopy. TEM images show that the  
157 particles can be found in the intestine (Fig. 5D) and the intestine lumen (Fig. 5E). Interestingly,  
158 particles aggregates were also detected inside muscle tissue, very close to the body wall (Fig.  
159 5F). Therefore, the nanoparticles can be located very close to excitable cells.

160

### 161 **Analysis of *C. elegans* locomotion**

162 Analysis of selected locomotion features revealed that worms fed with 1  $\mu\text{m}$  and 100 nm  
163 diameter paramagnetic nanoparticles, when they moved freely in MF, had altered locomotion  
164 dynamics, compared to worms without internalized nanoparticles.

165 We examined selected posture features for each worm of each group, namely the total  
166 body bends in degrees, and the number of bends (bend count) realized per worm. The total body  
167 bends were not affected by the presence of either particles or of MF (Fig. 6A). However, there  
168 was a significant increase in the number of bends per worm of Group 100 (Fig. 6B, WSR test  $p$ -  
169 value = 0.031) when the MF was on.

170 Next, we analyzed features related to the motion state and velocity of the worms. The  
171 forward/backward ratio of Group 100 worms decreased when the worms were moving inside the  
172 MF (Fig. 6C, WSR test  $p$ -value = 0.010) and so did their stay ratio (Fig. 6D, WSR test  $p$ -value =  
173 0.007). Regarding the effect of particles independently of MF, worms of Group 1 had increased  
174 stay ratio compared to control animals, even when the MF was turned off (Fig. 6D, Kruskal-Wallis  
175 test for all groups in OFF state  $p$ -value = 0.045, WSR test comparing Group C OFF and Group 1  
176 OFF  $p$ -value = 0.005). The speed of worms fed with 100 nm particles decreased when MF was  
177 on (Fig. 6I, WSR test  $p$ -value = 0.004), as did speed  $x$  for Group 100 (Fig. 6G, WSR test  $p$ -value  
178 = 0.016) and for Group 1 worms (Fig. 6G, WSR test  $p$ -value = 0.037), whereas speed  $y$   
179 component did not change significantly for any group tested (Fig. 6H). Velocity was not affected  
180 in any of the groups tested (Fig. 6E and 6F).

181 We also examined two established path describing features, path curvature and range.  
182 The path curvature was not affected by either the presence of particles in the worm body or by  
183 MF under the experimental conditions applied (Fig. 6J). However, the range traveled is smaller  
184 when worms of Group 1 were moving inside MF compared to the range traveled when worms of  
185 the same group were moving without the effect of MF (Fig. 6K, WSR test  $p$ -value = 0.019). This  
186 difference was not reflected in any of the distinct components of range ( $d_x$  and  $d_y$ , Figs. 6L and  
187 6M, respectively).

188 The  $p$ -values for all comparisons are provided in Tables S1 and S2.

189

190

## 191 Discussion

### 192 The impact of internalized nanoparticles on *C. elegans* locomotion

193 Metal nanoparticles of various types have been used to evaluate particle toxicity using *C.*  
194 *elegans* (Gonzalez-Moragas et al., 2017; Gonzalez-Moragas et al., 2015b; Wu et al., 2012; Lim  
195 et al., 2012). Particle coating and size, worm developmental stage and duration of exposure have  
196 been shown to affect translocation of particles in various tissues of the worm's body (Pluskota et  
197 al., 2009; Gonzalez-Moragas et al., 2017; Wu et al., 2012). Particles used in the present study  
198 are larger (Gonzalez-Moragas et al., 2017; Gonzalez-Moragas et al., 2015b; Wu et al., 2012; Lim  
199 et al., 2012) and worms have been exposed to them for a shorter period (18-20hrs) than  
200 elsewhere (Wu et al., 2012; Yang et al., 2017). These differences may explain why most of the  
201 nanoparticles are found along the worms' pharynx, upper intestine (Fig. 4A, 4B) and lower  
202 intestine area (Fig. 4B). The location of 40 nm particles in worms of Group 40 around the pharynx  
203 and grinder area (Fig. 4C) is only approximate, as some deformation has been induced on the

204 sample during preparation, and SEM allows for detecting objects that are close to the body  
205 surface. Particles aggregates are also found in the intestine (Fig. 5D), intestine lumen (Fig. 5E)  
206 and in muscle tissue (Fig. 5F).

207         Regarding locomotion features, the number of body bends in *C. elegans* L4 larvae has  
208 been shown to decrease significantly after exposure for 24 h to 9 nm nanoparticles coated with  
209 organic acid (Wu et al., 2012). Worms used in the present work are young adults and not larvae  
210 (Pluskota et al., 2009; Yang et al., 2017), which, as developing organisms, could be more  
211 vulnerable to toxic effects (Donkin and Williams, 1995). Moreover, particles used in the present  
212 work are larger (Gonzalez-Moragas et al., 2017; Gonzalez-Moragas et al., 2015b; Wu et al., 2012;  
213 Lim et al., 2012), and made of different metals (Lim et al., 2012; Li et al., 2012), which may result  
214 in different ability to overcome the intestine barrier or translocate to other tissues, as well as to  
215 different toxicity *per se*. Indeed, in our experiments, exposure of young adults to nanoparticles  
216 does not seem to massively affect posture, motion or path features (Fig. 6A-6M).

217         In our experiments, the only metrics that was affected by nanoparticles alone was the stay  
218 ratio for Group 1 (0.25, Fig. 6D), which was higher compared to Group C (0.12, Fig. 6D,  
219 comparison indicated by dashed line). This means that Group 1 worms remain paused for longer  
220 over the total time recorded, compared to Group C. Aggregates of 1  $\mu\text{m}$  particles in the intestine  
221 lumen (Fig. 4A) may resulted in heavier or more cumbersome worms, thus making it more difficult  
222 for them to move, although no difference to Group C worms speed and velocity was detected  
223 (Fig. 6E-6I). Since there was no MF present, no magnetic effect on the locomotive machinery  
224 could take place (see also next section), leaving the locomotion speed unaffected. However, the  
225 mass of the particles themselves, or the friction generated between the now heavier worms and  
226 the agar surface, could be one possible cause of the observed increased pausing (a single adult  
227 *C. elegans* mass is  $\sim 1 \mu\text{g}$  (Muschiol et al., 2009), and according to Methods, a single worm may  
228 have ingested 1  $\mu\text{m}$  nanoparticles up to 10-15% of its body mass). Other effects on *C. elegans*  
229 physiology, e.g. impact on muscle function or increased body stiffness, could also be responsible  
230 for the increased pausing observed in Group 1 animals. Exploring these issues, however, lies  
231 beyond the scope of this paper.

232

### 233 **The impact of internalized nanoparticles, combined with MF, on *C. elegans* locomotion**

234         Magnetotaxis in *C. elegans* was recently demonstrated (Vidal-Gadea, 2015), with the  
235 participation of AFD neurons, the first to be identified as magnetosensory. It was suggested that  
236 endogenous magnetic material, previously reported in *C. elegans*, may be also involved (Vidal-  
237 Gadea, 2015; Cranfield et al., 2004). These findings have sparked an ongoing discussion in the

238 *C. elegans* community (Landler et al., 2018; Vidal-Gadea et al., 2018). In our experiments, the  
239 locomotive behavior of Group C worms, which did not contain any particles, was not affected by  
240 the externally applied MF (Fig. 6). However, the presence of 100 nm and, in some cases, 1  $\mu\text{m}$ –  
241 diameter internalized nanoparticles had an impact on specific locomotion features (Fig. 6), when  
242 MF was applied.

243 Group 100 worms that were moving in MF displayed more body bends (Fig. 6B) and spent  
244 more time paused (Fig. 6C, 6D). More body bends possibly indicate a more W-shaped  
245 locomotion, which has been described previously in burrowing worms, as opposed to the S-  
246 shaped crawling or C-shaped swimming motion (Beron et al., 2015). During burrowing, worms  
247 have to put effort to move inside a viscous medium. Hence, one could assume that Group 100  
248 animals crawling in MF integrate more bends to their locomotion, to apply more effort to push their  
249 way forward. Indeed, counting the number of body bends has been suggested as a direct measure  
250 of the effort a worm is making to move (Hart, 2006). The assumption that moving may be laborious  
251 for these animals could be also supported by the fact that they pause more often (Fig. 6C, 6D)  
252 and they move more slowly (Fig. 6I). This is observed particularly in the direction of the MF (x  
253 direction, Fig. 2, Fig. 6G). The magnetic moment for the particles was aligned with the direction  
254 of the MF (on the plate surface they both follow the x direction, Fig. 3F).

255 Group 1 worms moving inside MF had also reduced speed in the direction of the MF  
256 ( $speed_x$ , Fig. 6G), which means that their locomotion was affected especially on the direction  
257 parallel to the MF. Moreover, Group 1 worms traveled over a smaller range (Fig. 6K), when the  
258 MF was on, which could reflect a modified exploratory behavior (Gray et al., 2005; Cheung et al.,  
259 2005). This is more likely to have happened due to changes in the locomotive status related to  
260 MF rather than to their incentive to explore, since other environmental factors (e.g., food  
261 abundance, temperature) did not change.

262 It is possible that worms slowed down when they found themselves in a particular  
263 orientation inside the MF, or when the internalized particles obtained a particular orientation with  
264 regard to the MF. This is supported by the results presented in Figure 2, where it is shown that  
265 the properties of MF change significantly in the direction of the MF. Therefore, any effect the MF  
266 may had on the particle-fed worm or on the internalized particles themselves, was changing as  
267 the worm was moving along the MF.

268 There was no effect detected in Group 40, in any of the metrics examined. This can be  
269 due to the smaller MF or smaller gradient of MF of the particles in this group. However, we have  
270 been able to estimate the MF and the gradient of MF only for the 1  $\mu\text{m}$  particles, due to lack of  
271 available information on the magnetic properties of the 40 nm and the 100 nm particles.



272 Nonetheless, we can compare the MF and gradient of MF between the particles based on their  
273 size (see Supplementary information). We found that smaller particles have larger gradient of MF  
274 compared to larger particles in their proximity. The overall impact each particle type has on the  
275 worms' physiology depends on the magnitude and the gradient of MF. Both depend on the  
276 material properties of the particles, which determine the magnetic moment. The experimental  
277 observations suggested that the stronger effect among the three studied particles occurred in the  
278 case of 100 nm particles.

279 The particles coating (Table 1) was not expected to affect their magnetic behavior. It could,  
280 however, impact their interaction with cells. Since the magnetic and physical properties of the  
281 particles are the most influential regarding the secondary MF effects, we focused on the particle  
282 size for our data analysis. In addition, the thickness of the coating was small (a single monolayer  
283 of streptavidin for the 1  $\mu\text{m}$  particles and a 2-3nm thick layer of polymer for the 40 nm particles,  
284 according to the manufacturers), which means that the magnetic core could still affect cells and  
285 tissues close to the particle. The experimental procedure did not allow us to know the quantity of  
286 particles ingested by each individual worm, nor the exact location and the precise interactions of  
287 particle aggregates in each individual. Therefore, we cannot extract conclusions based on the  
288 particles' quantity or exact aggregate location inside each worm tested.

289 Ideally, results shown in Figures 2 and 3 should be combined to assess the synergistic  
290 properties of the external component of the MF (generated by the electromagnets) and of the  
291 secondary component of the MF (generated by the particles in their vicinity). However, the MF  
292 generated by the particles is very localized (in the microscale), as shown in Figure 3. Thus, we  
293 discuss below the potential effects of the MF induced by the electromagnets and of the secondary  
294 MFs separately, and on their own respective scale. We also discuss the effect of particles  
295 aggregates behavior, under the influence of external MF.

296

### 297 **Potential impact of internalized particles, combined with external MF, on *C. elegans* tissues**

298 The forces that were created either by the external MF or the paramagnetic particles  
299 themselves were small (Fig. 3E), and they were not strong enough to mechanically push the  
300 worms to move along their line of action. Hence, there must be some other mechanism  
301 responsible for the detected changes in worms' locomotion. The magnitude of the external and  
302 secondary MFs had the same order of magnitude and they were small (Fig. 2 and 3A, 3C).  
303 However, the gradient of the MF fields in the vicinity of the particles was substantially large (Fig.  
304 2B, 2D).

305           Effects were likely to be more pronounced where the external MF was stronger, since that  
306 would result in stronger secondary MFs generated by the particles (until the magnetization of the  
307 particles becomes saturated). Hence, the locomotion of worms crawling under stronger MF,  
308 namely near the electromagnets (Fig. 2), was more likely to be affected, compared to worms that  
309 were moving where the external MF is weaker. Therefore, the spatial distribution of the MF can  
310 partly explain the variations observed in the experiments. Moreover, since we had no direct  
311 control over the location where particles resided in the worms' body, the presence or absence of  
312 paramagnetic particles where they could affect the mechanosensitive ion channels could be  
313 another reason for the variability that we observe in our experiments. In addition, the probability  
314 of a worm crawling into areas of higher magnetic flux, would result in it experiencing a stronger  
315 effect. The variations in the values of the metrics examined might in fact mirror that probability.

316           Zablotskii and colleagues (Zablotskii et al., 2016) provide several examples in which the  
317 gradient of MF can affect cellular and subcellular mechanisms. The gradient of the secondary MF  
318 fields obtained from our simulations (up to  $2 \times 10^5$  T/m for the 1  $\mu\text{m}$  particles, Fig. 3B, 3D) was well  
319 above the threshold that Zablotskii and colleagues (Zablotskii et al., 2016) suggest may impact  
320 cells with mechanosensitive ion channels ( $10^3$  T/m, see also Table 2 of Zablotskii et al., 2016).  
321 The gradient of the secondary internal MF fields was also above the threshold the same authors  
322 pose for magnetically induced changes on gene expression, however we consider such a  
323 possibility highly unlikely in our case, due to the very short time the external MF was applied (~  
324 3.5min). Therefore, the secondary field generated by the paramagnetic particles upon application  
325 of external MF could lead to local gradients of MF inside the worm's body, large enough to  
326 interfere with the functionality of excitable cells (e.g., body muscle cells, see also Fig. 5F).

327           This could have happened by affecting the cells' ion channels, provided that the particles  
328 were very close or even in contact with the cells' membrane. Experimental data presented here  
329 cannot provide insight on exactly which cells might have been the target of the observed MF  
330 effect. However, TEM findings (Fig. 5) showed that particles aggregates could be located in body  
331 wall muscles (Fig. 5F). Therefore, the possibility that excitable, e.g. muscle cells, were affected  
332 by ingested particles in the presence of MF, is considerable. Moreover, impact on the intestine  
333 (Fig. 5D, 5E) could affect *C. elegans* physiology and locomotion dynamics, given the multiple  
334 roles of this complex tissue (McGhee, 2007; Nagy et al., 2015). Further experiments are needed  
335 to clarify the mechanism behind the observed changes.

336           The possibility of MF having a direct action on the magnetosensitive neurons described in  
337 *C. elegans* by other authors (Vidal-Gadea, 2015) cannot be excluded. However, even if this were  
338 true, this action was not reflected in changed locomotion dynamics, which are the object of the

339 present study. Note that in our experiments we did not have direct evidence of sensory or motor  
340 neurons being affected by MF, neither was that possibility explored.

341 Moreover, it is known that when magnetic field is applied to a population of paramagnetic  
342 particles, the particles self-organize into arrays, columns, or chains, depending on the nature of  
343 the applied magnetic field and the properties of the particle-containing medium (Liu et al., 2005;  
344 Liu et al., 1995; Doyle et al., 2002; Mirzakhali et al., 2017). In our experiments, when the MF is  
345 turned ON, it is likely that the internalized particles start moving, as they organize into self-  
346 assembled structures. Therefore, it is possible that this motion applies pressure on or stretches  
347 the surrounding tissue, resulting in disturbance of the normal locomotion pattern.

348

## 349 **Conclusions**

350 The effect of internalized paramagnetic nanoparticles, in combination with externally  
351 applied magnetic field, on the dynamics of *C. elegans*' locomotion is shown here. Established  
352 locomotion metrics, i.e. speed, motion state, bend count, showed differences between untreated  
353 worms and worms treated with particles when moving inside magnetic field, while they showed  
354 no difference between untreated and particles-treated worms in the absence of magnetic field.  
355 Possible explanations on the mechanism that leads to the observed results are provided by work  
356 on the effect of magnetic field gradients on cells (Zablotskii et al., 2016; Zablotskii et al., 2014),  
357 mediated by magnetic nanoparticles (Hughes et al., 2008), and by work on the self-organizing  
358 behavior of paramagnetic particles aggregates inside MF (Liu et al., 2005; Liu et al., 1995; Doyle  
359 et al., 2002). The exact mechanism by which the observed effect is achieved in the case of *C.*  
360 *elegans* needs to be further clarified. Our findings on the impact of internalized paramagnetic  
361 nanoparticles, in combination with externally applied magnetic field, on animals' behavior, could  
362 pave the way for more detailed studies on the sensitivity of biological systems to these biophysical  
363 factors. *C. elegans* nematodes could play a key role in the effort to decipher such phenomena.

364

365

366

## 367 **Materials and Methods**

### 368 **Nanoparticles internalization**

369 We investigated the locomotion of four groups of young adult wild type N2 *C. elegans*  
370 hermaphrodites, fed on (see also Table 1):

371 i) plain bacterial food source *E. coli* OP50, control animals-Group C, n=29;

- 372 ii) *E. coli* OP50 mixed with 1  $\mu\text{m}$ -diameter paramagnetic particles (Dynabeads MyOne  
373 Streptavidin C1, Invitrogen, Thermo Fisher Scientific, USA), Group 1, n=33;  
374 iii) *E. coli* OP50 mixed with 100 nm-diameter paramagnetic particles (nanomag-CLD-red,  
375 Micromod Partikeltechnologie GmbH, Germany), Group 100, n=38 and  
376 iv) *E. coli* OP50 mixed with 40 nm-diameter paramagnetic particles (iron oxide nanocrystals,  
377 Ocean NanoTech, USA), Group 40, n=42.

378 In all cases, particles were isolated from the initial suspension by brief centrifugation and were re-  
379 suspended in OP50 in a final concentration of 0.5 mg/ml OP50-particle mix. Freshly made 60 mm  
380 standard NGM plates were seeded with 100  $\mu\text{l}$  of plain OP50 or OP50-particle mix. Plates were  
381 left to dry overnight in room temperature and  $\sim 20$  worms were transferred in them the next day.  
382 Nematodes were left to feed on the plain or enriched bacterial lawn for 18-20 h, at 20 °C. Then,  
383 they were either prepared for microscopy or 12-15 of them were transferred to a fresh, unseeded  
384 35 mm NGM plate for locomotion recording. In the second case, worms were left to acclimatize  
385 in the new plate for  $\sim 15$  min before recording. There were three reasons for transferring worms  
386 to a new, smaller plate. First, we wanted the worms to experience the effect of only internalized  
387 nanoparticles under MF and not of the remaining particles on the plate surface. Second, the  
388 presence of enriched bacterial lawn on the plate surface interfered with the tracking algorithm and  
389 could have affected the worms' locomotion due to its viscosity. Third, by using 35 mm plates we  
390 decreased the distance between the electromagnets and the worms (as shown in Fig. 1), so that  
391 the worms experience a stronger external MF.

392 For each group tested, experiments were run over 3 different experimental days.  
393 Therefore, each experimental day we processed 10-14 worms for a specific group. These 10-14  
394 worms were treated simultaneously (on the same plate), and each one of them is considered a  
395 biological replicate.

396

### 397 **Fluorescent, Scanning and Transmission Electron Microscopy (SEM and TEM)**

398 *Fluorescent Microscopy:* Worms were transferred to an unseeded NGM plate and were  
399 washed with 0.5 ml of 1X PBS. Next, they were transferred to a glass slide, where they were  
400 anesthetized on fresh agar pads (Shaham, 2006), using 10 mM  $\text{NaN}_3$  (Sulston, 1988). Samples  
401 were imaged using a BX51WI Olympus fluorescent microscope (Olympus, Tokyo, Japan) coupled  
402 with an ORCA-flash4.0 camera (Hamamatsu Photonics, Hamamatsu City, Japan).

403 *Scanning Electron Microscopy:* Samples were prepared as described previously (Hall et  
404 al., 1999; Shaham, 2006), with modifications, dissection omitted. Briefly, worms were transferred  
405 to an unseeded NGM plate and were washed with 0.5 ml of 1X PBS. Next, they were transferred

406 to a glass cover slip and were anesthetized using 10 mM NaN<sub>3</sub> (Sulston, 1988). Samples were  
407 imaged using FEI Helios 650 nanolab SEM/FIB (FEI, Thermo Fisher Scientific, Waltham, MA).

408 *Transmission Electron Microscopy:* Samples were prepared based on the literature (Hall  
409 et al., 2012; Kovacs, 2015), with modifications. Briefly, tissues were fixed in pre-warmed or RT  
410 (room temperature) 3.2% PFA, 0.2% glutaraldehyde in 0.1 M sodium cacodylate buffer for 1h at  
411 RT and incubated overnight at 4 °C. Next, they were rinsed 3 x 10 min with 0.1 M sodium  
412 cacodylate buffer, and post-fix in 2% OsO<sub>4</sub> in 0.1 M sodium cacodylate buffer for 1 h at RT.  
413 Another rinse 3 x 10 min with 0.1 M sodium cacodylate buffer followed, and then worms were  
414 embedded in resin mold in histogel. Samples were dehydrated for 15 min each in 50%, 70%,  
415 90%, 95%, and finally two changes of 100% ethanol, cleared in two 15 min changes of propylene  
416 oxide, and infiltrated in propylene oxide:epon (Embed812), as follows: a.3:1, 1 h, b. 1:1, 1 h, c.  
417 1:3, 1 h, d. Full strength, 2 h or overnight, two changes. Finally, samples were embedded in beam  
418 capsules in full epon, and polymerized at 60°C for 24 h. Samples were imaged using a JEM-1400-  
419 plus transmission electron microscope (JEOL, Peabody, MA).

420

### 421 **Worm Recording and Tracking**

422 *Recording:* A 35 mm plate containing worms of a specific group was placed between the  
423 two electromagnets, as shown in Figure 1, so that the plate surface and therefore the worms were  
424 positioned close to the center of the electromagnets. First, a 200 sec movie (1 frame/sec) was  
425 recorded in the absence of MF (OFF state) and immediately after, a second 200 sec movie (1  
426 frame/sec) was recorded with the MF on (ON state), using QCapture Pro software, (QImaging,  
427 Surrey, Canada) and a Micropublisher3.3 RTV camera (QImaging, Surrey, Canada), mounted on  
428 an Olympus SZ61 microscope (Olympus, Tokyo, Japan). We recorded over 200 sec intervals  
429 because we were interested in detecting the transient effect of MF on locomotion dynamics. The  
430 two electromagnets used were a 4.0" Dia. Electromagnet, 12 VDC, and a 3.5" Dia. Electromagnet,  
431 12 VDC, both from APW Company, Rockaway, NJ. Electromagnets were operated at 1.67 A and  
432 3 A respectively, as indicated by the manufacturer, using a 1762 DC power supply (BK Precision,  
433 Yorba Linda, CA). By using a non-contact infrared thermometer (Omega Engineering, Norwalk,  
434 CT) we verified that the plate surface temperature remained constant throughout the recording  
435 period.

436 *Tracking:* Every movie was imported to MATLAB (MathWorks, Natick, MA) for post-  
437 processing. Each worm was tracked individually. To this end, we developed a custom tracking  
438 code in MATLAB (Fig. S2). In the first step, all frames were used to construct the movie  
439 background, which consisted of all the objects that did not move for long periods of time during

440 the entire recording. Then, each frame was subtracted from the background to extract the  
441 foreground, which consisted of all moving objects. Next, the user was prompted with the initial  
442 frame of the movie, of which the background had been already subtracted, to select the worm to  
443 be tracked by the software. After the user selected the worm, the code created a small examining  
444 frame around it and excluded the targeted worm from the rest of the movie frame. Then, the  
445 cropped figure was converted to a binary image. After the binary image was enhanced, the shape  
446 of the binary object, i.e. the worm, and its global position were stored. Next, the code proceeded  
447 to the next movie frame and used the extracted global location of the worm as the center of the  
448 small examining frame. The small examining frame must be large enough to capture the motion  
449 of the worm in two successive movie frames. Since there was more than one worm freely moving  
450 in each experiment, there were occasions in which more than one object were included in the  
451 small examining frame. For such occasions, the user was prompted by the code to manually  
452 indicate again the worm to be tracked. This way the worm that was initially selected to be tracked  
453 was always encapsulated by the examining frame. The code continued the tracking process until  
454 the last frame of the movie was processed, and it stored the shape of the worm and its global  
455 location for each frame. Once finished, the user run the code again to track another worm.

456

## 457 **Locomotion Analysis**

458 The following features of *C. elegans* morphology and experimental setup properties were  
459 used for the quantification of *C. elegans* locomotion parameters.

### 460 *Morphology Features*

- 461 1. Length: The worm length was defined as the chain-code pixel length of worm skeleton,  
462 which was converted into mm.
- 463 2. Centroid: The worm density was assumed to be constant throughout its body, so the  
464 centroid of mass was the same as geometric centroid. Since the swing of the head or tail  
465 (first or last 1/12 chain-code length part of the worm) can significantly influence centroid  
466 determination, they were ignored when computing the centroid.

### 467 *Setup*

- 468 1. Coordinates system: The *x* axis was set along the direction of the MF, between the two  
469 electromagnets, and *z* axis was normal to the plate, pointing upwards (Fig.1). Thus, by  
470 applying the right-hand rule, the coordinates system was established. Since we did not  
471 identify head/tail orientation for the worms, the coordinates system was important for the  
472 detection of directionality.

473 2. Unit Conversion: Any feature regarding length was derived first in pixels. With a known  
474 length recorded with the same experimental setup, the conversion between pixels and  
475 microns was determined.

476 Locomotion-related parameters of interest were divided in three categories: posture features,  
477 motion features and path features, as described extensively by Yemini and colleagues (Yemini et  
478 al., 2013), with minor modifications. A brief description of the examined features follows below.

#### 479 *Posture Features*

480 1. Bends: The total body bends, measured in degrees, derive from the clockwise difference  
481 between two tangent supplementary angles (Fig. S4) along the worm skeleton. The mean  
482 value ( $mean_{bends}$ ) and standard deviation of bends ( $std_{bends}$ ) over the worm were also  
483 calculated, as intermediate steps.

484 2. Bend Count: This metric ( $bends_{num}$ ) corresponds to the number of bends along a single  
485 worm. First, the supplementary angles (see above, Bends) were computed along the  
486 worm skeleton. Next, a Gaussian filter over each 1/12 of the chain-code length of the  
487 skeleton was applied to the supplementary angles to smooth out any high frequency  
488 changes and is then normalized. The filter had a constant proportional to the reciprocal of  
489 the standard deviation,  $\alpha=2.5$ . By checking the sequence of supplementary angles, the  
490 bend count was incremented whenever the angle reaches  $0^\circ$  or changes sign. The check  
491 started from the first 1/12 segment to the last 1/12 segment to ignore small bends near  
492 the tail and the head.

#### 493 *Motion Features*

494 1. Motion State: Worm's motion state can be divided in two types, the forward/backward state  
495 and the paused state. The worm was considered to be in the forward/backward state when  
496 its instantaneous speed was greater or equal to 5% of its mean length per second, and it  
497 was considered in the paused state when the instantaneous speed was less than 5% of  
498 its mean length per second. Therefore, the ratio of the time the worm was in the  
499 forward/backward state over the total recording time, namely the  $fb_{ratio}$ , and the ratio of  
500 the time the worm was in the paused state over the total recording time, namely the stay  
501 ratio  $stay_{ratio}$ , were calculated.

502 2. Velocity: Velocity is defined as the signed difference between a single worm's centroids  
503 of two sequential frames in the coordinate over the time gap between two frames (1sec).  
504 Velocity was further projected on two orthogonal axes  $x$  and  $y$  in the plane of the plate  
505 (Fig. 1), namely  $velocity_x$  and  $velocity_y$ . The absolute value of velocity and its  
506 components gave  $speed$ ,  $speed_x$  and  $speed_y$ , respectively.

## 507 *Path Features*

- 508 1. Path Curvature: This metric is defined as the angle, in radians, of the worm's path divided  
509 by the distance traveled, in microns. Three successive frames were used to approximate  
510 the start, middle and end of the worm's instantaneous path curvature. The angle was  
511 measured by the difference in tangent angles between the second to last frame centroid  
512 and the first to the second frame centroid. Then, the path curvature was obtained by  
513 dividing the angle by the distance between the first and last centroid.
- 514 2. Range: Range is defined as the distance between the worm's centroid and the centroid of  
515 the worm's path, in each frame. The range was projected onto the orthogonal axes  $x$  and  
516  $y$  in the plane of the plate (Fig. 1) to obtain the  $x$ -range  $d_x$ , and the  $y$ -range  $d_y$ .

517

## 518 **Magnetic field characterization**

519 COMSOL Multiphysics (COMSOL, Burlington, MA) software was used to characterize the  
520 MF that is generated by the two electromagnets in the experimental setup. The data for the  
521 magnetic flux density of the electromagnets (available from the manufacturer) was used to  
522 calibrate the parameters of the electromagnets in COMSOL Multiphysics. The COMSOL  
523 Multiphysics model was used also to estimate the intensity of the external MF, the gradient of the  
524 external MF, and the forces that are applied on paramagnetic particles by the external MF.  
525 MATLAB was used to calculate the forces applied on the paramagnetic nanoparticles. More  
526 details are given in the Supplementary Information section.

527

## 528 **Statistical analysis**

529 Locomotion features were analyzed using non-parametric tests, since the Anderson-  
530 Darling normality test  $p$ -value was  $> 0.05$  for all samples, thus rejecting the normality null  
531 hypothesis. For each metric analyzed, the Kruskal-Wallis test was used to detect whether there  
532 was any significant difference among the behaviors of all four groups in the absence of MF (OFF  
533 state). This comparison was done to determine whether the presence of particles themselves  
534 affects locomotion, regardless of external MF. Results were adjusted for ties and any difference  
535 was considered statistically significant when  $p \leq 0.05$ . To detect differences among worms of the  
536 same group, the Wilcoxon Signed Rank (WSR) test was used and differences were considered  
537 statistically significant when  $p \leq 0.05$ . All analyses were performed in Minitab (Minitab, State  
538 College, PA).

539 To design the experiment, we run a statistical power analysis, using G\*Power opensource  
540 software (Fig. S5). We prepared the sample size used in the experiments based on this



541 estimation. In order to make sure that we would have enough worms, since some of them might  
542 be injured or lost during the process, we slightly increased the sample size number.

543

544

#### 545 **Authors Contributions**

546 BE and EG conceived the idea; EG, EM and BE designed the experiments; EG and YZ run  
547 experiments; YZ run tracking algorithm, processed and analyzed recordings; EM created tracking  
548 algorithm and run simulations; EG, YZ and EM collected and analyzed data; EG and EM wrote  
549 the paper, with input from YZ. All authors reviewed and edited the manuscript and gave final  
550 approval for publication.

551

552

#### 553 **Acknowledgments**

554 We thank Nikos Chronis, Kenn Oldham and Jinhong Qu for the use of selected equipment, and  
555 Syeda Maisa for help with preliminary worm videos. Scanning electron microscopy was performed  
556 at the Electron Microbeam Analysis Laboratory (EMAL), with support from the University of  
557 Michigan College of Engineering; we thank John Mansfield, Kai Sun and Haiping Sun for the  
558 training. Transmission electron microscopy was performed at the Microscopy & Image Analysis  
559 Laboratory (MIL) at the University of Michigan Medical School; we are grateful to Jeff Harrison  
560 and Penelope Blakely for their help and guidance. We thank Surojit Sural for his valuable input  
561 on power analysis, and to Hannah Seidel and Elisa Frankel for feedback. We are particularly  
562 grateful to Hong Zhan for his generous help with TEM images interpretation.

563

564 **Competing interests:** No competing interests declared.

565

566 **Funding:** This work was supported by the National Sciences Foundation, Division of Civil,  
567 Mechanical and Manufacturing Innovation [award #1334908 to B.E.], and the University of  
568 Michigan Office of Research [grant #U055203 to E.G.].

569

570

571

572

573

574 **References**

- 575 Bae, J.-E., Bang, S., Min, S., Lee, S.-H., Kwon, S.-H., Lee, Y., Lee, Y.-H., Chung, J. & Chae, K.-S. 2016. Positive  
576 geotactic behaviors induced by geomagnetic field in *Drosophila*. *Molecular Brain*, 9, 55.
- 577 Bansal, A., Zhu, L. J., Yen, K. & Tissenbaum, H. A. 2015. Uncoupling lifespan and healthspan in  
578 *Caenorhabditis elegans* longevity mutants. *Proceedings of the National Academy of Sciences*, 112,  
579 E277-E286.
- 580 Belova, N. A. & Acosta-Avalos, D. 2015. The Effect of Extremely Low Frequency Alternating Magnetic Field  
581 on the Behavior of Animals in the Presence of the Geomagnetic Field. *Journal of Biophysics*, 2015,  
582 8.
- 583 Beron, C., Vidal-Gadea, A. G., Cohn, J., Parikh, A., Huong, G. & Pierce-Shimomura, J. T. 2015. The burrowing  
584 behavior of the nematode *Caenorhabditis elegans*: A new assay for the study of neuromuscular  
585 disorders. *Genes, brain, and behavior*, 14, 357-368.
- 586 Cheung, B. H., Cohen, M., Rogers, C., Albayram, O. & De Bono, M. 2005. Experience-dependent  
587 modulation of *C. elegans* behavior by ambient oxygen. *Current Biology*, 15, 905-917.
- 588 Cranfield, C. G., Dawe, A., Karloukovski, V., Dunin-Borkowski, R. E., De Pomerai, D. & Dobson, J. 2004.  
589 Biogenic magnetite in the nematode *caenorhabditis elegans*. *Proceedings in Biological Sciences*,  
590 271 Suppl 6, S436-S439.
- 591 De Bono, M. & Bargmann, C. I. 1998. Natural Variation in a Neuropeptide Y Receptor Homolog Modifies  
592 Social Behavior and Food Response in *C. elegans*. *Cell*, 94, 679-689.
- 593 Donkin, S. G. & Williams, P. L. 1995. Influence of developmental stage, salts and food presence on various  
594 end points using *Caenorhabditis Elegans* for aquatic toxicity testing. *Environmental Toxicology and*  
595 *Chemistry*, 14, 2139-2147.
- 596 Doyle, P. S., Bibette, J., Bancaud, A. & Viovy, J.-L. 2002. Self-Assembled Magnetic Matrices for DNA  
597 Separation Chips. *Science*, 295, 2237-2237.
- 598 Fedele, G., Green, E. W., Rosato, E. & Kyriacou, C. P. 2014. An electromagnetic field disrupts negative  
599 geotaxis in *Drosophila* via a CRY-dependent pathway. *Nature Communications*, 5, 4391.
- 600 Ghodbane, S., Lahbib, A., Sakly, M. & Abdelmelek, H. 2013. Bioeffects of static magnetic fields: oxidative  
601 stress, genotoxic effects, and cancer studies. *Biomedical Research International* 2013, 602987.
- 602 Giachello, C. N. G., Scrutton, N. S., Jones, A. R. & Baines, R. A. 2016. Magnetic Fields Modulate Blue-Light-  
603 Dependent Regulation of Neuronal Firing by Cryptochrome. *The Journal of Neuroscience*, 36,  
604 10742-10749.

- 605 Gonzalez-Moragas, L., Roig, A. & Laromaine, A. 2015a. *C. elegans* as a tool for in vivo nanoparticle  
606 assessment. *Advances in Colloid and Interface Science*, 219, 10-26.
- 607 Gonzalez-Moragas, L., Yu, S.-M., Benseny-Cases, N., Stürzenbaum, S., Roig, A. & Laromaine, A. 2017.  
608 Toxicogenomics of iron oxide nanoparticles in the nematode *C. elegans*. *Nanotoxicology*, 11, 647-  
609 657.
- 610 Gonzalez-Moragas, L., Yu, S.-M., Carenza, E., Laromaine, A. & Roig, A. 2015b. Protective Effects of Bovine  
611 Serum Albumin on Superparamagnetic Iron Oxide Nanoparticles Evaluated in the Nematode  
612 *Caenorhabditis elegans*. *ACS Biomaterials Science & Engineering*, 1, 1129-1138.
- 613 Gourgou, E., Chronis, N. 2016. Chemically induced oxidative stress affects ASH neuronal function and  
614 behavior in *C. elegans*. *Scientific Reports*, 6, 38147.
- 615 Gray, J. M., Hill, J. J. & Bargmann, C. I. 2005. A circuit for navigation in *Caenorhabditis elegans*. *Proceedings*  
616 *of the National Academy of Sciences of the United States of America*, 102, 3184-3191.
- 617 Hahm, J. H., Kim, S., Diloreto, R. & Shi, C. 2015. *C. elegans* maximum velocity correlates with healthspan  
618 and is maintained in worms with an insulin receptor mutation. *Nature Communications*, 6, 8919.
- 619 Hall, D. H., Hartweg, E. & Nguyen, K. C. 2012. Modern electron microscopy methods for *C. elegans*.  
620 *Methods in Cell Biology*, 107, 93-149.
- 621 Hall, D. H., Winfrey, V. P., Blaeuer, G., Hoffman, L. H., Furuta, T., Rose, K. L., Hobert, O. & Greenstein, D.  
622 1999. Ultrastructural Features of the Adult Hermaphrodite Gonad of *Caenorhabditis elegans*:  
623 Relations between the Germ Line and Soma. *Developmental Biology*, 212, 101-123.
- 624 Hart, A. C. 2006. Behavior. *In: Ambros (ed.) Wormbook*. The *C. elegans* Research Community.
- 625 Hedgecock, E. M. & Russell, R. L. 1975. Normal and mutant thermotaxis in the nematode *Caenorhabditis*  
626 *elegans*. *Proceedings of the National Academy of Sciences of the United States of America* 72,  
627 4061-4065.
- 628 Hong, F. T. 1995. Magnetic field effects on biomolecules, cells, and living organisms. *Biosystems*, 36, 187-  
629 229.
- 630 Hsu, A.-L., Feng, Z., Hsieh, M.-Y. & Xu, X. Z. S. 2009. Identification by machine vision of the rate of motor  
631 activity decline as a lifespan predictor in *C. elegans*. *Neurobiology of aging*, 30, 1498-1503.
- 632 Huang, H., Delikanli, S., Zeng, H., Ferkey, D. M. & Pralle, A. 2010. Remote control of ion channels and  
633 neurons through magnetic-field heating of nanoparticles. *Nature Nanotechnology* 5, 602-606.
- 634 Hughes, S., Mcbain, S., Dobson, J. & El Haj, A. J. 2008. Selective activation of mechanosensitive ion  
635 channels using magnetic particles. *Journal of Royal Society Interface*, 5, 855-863.

- 636 Kale, P. G. & Baum, J. W. 1980. Genetic effects of strong magnetic fields in *Drosophila melanogaster*: II.  
637 Lack of interaction between homogeneous fields and fission neutron-plus-gamma radiation.  
638 *Environmental Mutagenesis*, 2, 179-186.
- 639 Khare, P., Sonane, M., Pandey, R., Ali, S., Gupta, K. C. & Satish, A. 2011. Adverse Effects of TiO<sub>2</sub> and ZnO  
640 Nanoparticles in Soil Nematode, *Caenorhabditis elegans*. *Journal of Biomedical Nanotechnology*,  
641 7, 116-117.
- 642 Kim, J. H., Lee, S. H., Cha, Y. J., Hong, S. J., Chung, S. K., Park, T. H. & Choi, S. S. 2017. *C. elegans*-on-a-chip  
643 for in situ and in vivo Ag nanoparticles' uptake and toxicity assay. *Scientific Reports*, 7, 40225.
- 644 Kovacs, A. L. 2015. The application of traditional transmission electron microscopy for autophagy research  
645 in *Caenorhabditis elegans*. *Biophys Rep*, 1, 99-105.
- 646 Kumari, K., Capstick, M., Cassara, A. M., Herrala, M., Koivisto, H., Naarala, J., Tanila, H., Viluksela, M. &  
647 Juutilainen, J. 2017. Effects of intermediate frequency magnetic fields on male fertility indicators  
648 in mice. *Environmental Research*, 157, 64-70.
- 649 Landler, L., Nimpf, S., Hochstoeger, T., Nordmann, G. C., Papadaki-Anastasopoulou, A. & Keays, D. A. 2018.  
650 Comment on "Magnetosensitive neurons mediate geomagnetic orientation in *Caenorhabditis*  
651 *elegans*". *eLife*, 7, e30187.
- 652 Lee, C.-H., Hung, Y.-C. & Huang, G. S. 2010. Static magnetic field accelerates aging and development in  
653 nematode. *Communicative & Integrative Biology*, 3, 528-529.
- 654 Lewczuk, B., Redlarski, G., Arkadiusz, Zikowska, N., Przybylska-Gornowicz, B., Krawczuk, M. 2014.  
655 Influence of Electric, Magnetic, and Electromagnetic Fields on the Circadian System: Current Stage  
656 of Knowledge. *BioMed Research International*, 2014, 13.
- 657 Li, G., Gong, J., Lei, H., Liu, J. & Xu, X. Z. S. 2016. Promotion of behavior and neuronal function by reactive  
658 oxygen species in *C. elegans*. *Nature Communications*, 7, 13234.
- 659 Li, Y., Yu, S., Wu, Q., Tang, M., Pu, Y. & Wang, D. 2012. Chronic Al<sub>2</sub>O<sub>3</sub>-nanoparticle exposure causes  
660 neurotoxic effects on locomotion behaviors by inducing severe ROS production and disruption of  
661 ROS defense mechanisms in nematode *Caenorhabditis elegans*. *J Hazard Mater*, 219-220, 221-  
662 230.
- 663 Liedtke, W., Tobin, D. M., Bargmann, C. I. & Friedman, J. M. 2003. Mammalian TRPV4 (VR-OAC) directs  
664 behavioral responses to osmotic and mechanical stimuli in *Caenorhabditis elegans*. *Proceedings*  
665 *of the National Academy of Sciences*, 100, 14531-14536.

- 666 Lim, D., Roh, J. Y., Eom, H. J., Choi, J. Y., Hyun, J. & Choi, J. 2012. Oxidative stress-related PMK-1 P38 MAPK  
667 activation as a mechanism for toxicity of silver nanoparticles to reproduction in the nematode  
668 *Caenorhabditis elegans*. *Environ Toxicol Chem*, 31, 585-592.
- 669 Liu, D., Maxey, M. R. & Karniadakis, G. E. 2005. Simulations of dynamic self-assembly of paramagnetic  
670 microspheres in confined microgeometries. *Journal of Micromechanics and Microengineering*, 15,  
671 2298.
- 672 Liu, J., Lawrence, E. M., Wu, A., Ivey, M. L., Flores, G. A., Javier, K., Bibette, J. & Richard, J. 1995. Field-  
673 Induced Structures in Ferrofluid Emulsions. *Phys Rev Lett*, 74, 2828-2831.
- 674 Liu, J., Zhang, B., Lei, H., Feng, Z., Liu, J., Hsu, A. L., Xu, X. Z. 2013. Functional aging in the nervous system  
675 contributes to age-dependent motor activity decline in *C. elegans*. *Cell Metab*, 18, 392-402.
- 676 Long, X., Ye, J., Zhao, D. & Zhang, S.-J. 2015. Magnetogenetics: remote non-invasive magnetic activation  
677 of neuronal activity with a magnetoreceptor. *Science Bulletin*, 60, 2107-2119.
- 678 Ma, H., Bertsch, P. M., Glenn, T. C., Kabengi, N. J. & Williams, P. L. 2009. Toxicity of manufactured zinc  
679 oxide nanoparticles in the nematode *Caenorhabditis elegans*. *Environ Toxicol Chem*, 28, 1324-  
680 1330.
- 681 Malkemper, E. P., Eder, S. H. K., Begall, S., Phillips, J. B., Winklhofer, M., Hart, V. & Burda, H. 2015.  
682 Magnetoreception in the wood mouse (*Apodemus sylvaticus*): influence of weak frequency-  
683 modulated radio frequency fields. *Scientific Reports*, 5, 9917.
- 684 Mcghee, J. D. 2007. The *C. elegans* intestine. In: Seydoux G. (ed.) *WormBook*. The *C. elegans* Research  
685 Community.
- 686 Meyer, J. N., Lord, C. A., Yang, X. Y., Turner, E. A., Badireddy, A. R., Marinakos, S. M., Chilkoti, A., Wiesner,  
687 M. R. & Auffan, M. 2010. Intracellular uptake and associated toxicity of silver nanoparticles in  
688 *Caenorhabditis elegans*. *Aquat Toxicol*, 100, 140-150.
- 689 Mirzakhali, E., Nam, W. & Epureanu, B. I. 2017. Reduced-order models for the dynamics of  
690 superparamagnetic nanoparticles interacting with cargoes transported by kinesins. *Nonlinear  
691 Dynamics*, 90, 425-442.
- 692 Miyakoshi, J. 2005. Effects of static magnetic fields at the cellular level. *Prog Biophys Mol Biol*, 87, 213-  
693 223.
- 694 Muschiol, D., Schroeder, F. & Traunspurger, W. 2009. Life cycle and population growth rate of  
695 *Caenorhabditis elegans* studied by a new method. *BMC Ecology*, 9, 14-14.
- 696 Nagy, S., Huang, Y.-C., Alkema, M. J. & Biron, D. 2015. *Caenorhabditis elegans* exhibit a coupling between  
697 the defecation motor program and directed locomotion. *Scientific Reports*, 5, 17174.

- 698 Naito, M., Hirai, S., Mihara, M., Terayama, H., Hatayama, N., Hayashi, S., Matsushita, M. & Itoh, M. 2012.  
699 Effect of a Magnetic Field on *Drosophila* under Supercooled Conditions. *PLoS ONE*, 7, e51902.
- 700 Nakata, K., Hu, Y., Uzun, O., Bakr, O. & Stellacci, F. 2008. Chains of Superparamagnetic Nanoparticles.  
701 *Advanced Materials*, 20, 4294-4299.
- 702 Njus, Z., Feldmann, D., Brien, R., Kong, T., Kalwa, U., Pandey, S. 2015. Characterizing the Effect of Static  
703 Magnetic Fields on *C. elegans* Using Microfluidics. *Advances in Bioscience and*  
704 *Biotechnology*, 06, 583-591.
- 705 Öcal, I., Kalkan, T., Ganay, O. 2008. Effects of alternating magnetic field on the metabolism of the healthy  
706 and diabetic organisms. *Brazilian Archives of Biology and Technology*, 51, 523-530.
- 707 Osipova, E. A., Pavlova, V. V., Nepomnyashchikh, V. A. & Krylov, V. V. 2016. Influence of magnetic field on  
708 zebrafish activity and orientation in a plus maze. *Behav Processes*, 122, 80-86.
- 709 Parida, L., Neogi, S. & Padmanabhan, V. 2014. Effect of Temperature Pre-Exposure on the Locomotion and  
710 Chemotaxis of *C. elegans*. *PLOS ONE*, 9, e111342.
- 711 Peliti, M., Chuang, J. S. & Shaham, S. 2013. Directional Locomotion of *C. elegans* in the Absence of External  
712 Stimuli. *PLOS ONE*, 8, e78535.
- 713 Pierce-Shimomura, J. T., Chen, B. L., Mun, J. J., Ho, R., Sarkis, R. & McIntire, S. L. 2008. Genetic analysis of  
714 crawling and swimming locomotory patterns in *C. elegans*. *Proceedings of the National Academy*  
715 *of Sciences of the United States of America*, 105, 20982-20987.
- 716 Pluskota, A., Horzowski, E., Bossinger, O. & Von Mikecz, A. 2009. In *Caenorhabditis elegans* Nanoparticle-  
717 Bio-Interactions Become Transparent: Silica-Nanoparticles Induce Reproductive Senescence.  
718 *PLOS ONE*, 4, e6622.
- 719 Ramirez, E., Monteagudo, J. L., Garcia-Gracia, M. & Delgado, J. M. R. 1983. Oviposition and development  
720 of *Drosophila* modified by magnetic fields. *Bioelectromagnetics*, 4, 315-326.
- 721 Shaham, S. W. 2006. Methods in Cell Biology, WormBook. In: Viktor Ambros (ed.) *WormBook*
- 722 Shaw, J., Boyd, A., House, M., Woodward, R., Mathes, F., Cowin, G., Saunders, M. & Baer, B. 2015.  
723 Magnetic particle-mediated magnetoreception. *Journal of the Royal Society Interface*, 12, 0499.
- 724 Shcherbakov, D., Winklhofer, M., Petersen, N., Steidle, J., Hilbig, R. & Blum, M. Magnetosensation in  
725 zebrafish. *Current Biology*, 15, R161-R162.
- 726 Shtonda, B. B. & Avery, L. 2006. Dietary choice behavior in *Caenorhabditis elegans*. *The Journal of*  
727 *experimental biology*, 209, 89-102.
- 728 Sulston, J. E., Hodgkin, J. 1988. Methods. In: Wb (ed.) *The Nematode Caenorhabditis elegans*. Cold Spring  
729 Harbor, NY: Cold Spring Harbor Laboratory Press.

- 730 Teodori, L., Grabarek, J., Smolewski, P., Ghibelli, L., Bergamaschi, A., De Nicola, M. & Darzynkiewicz, Z.  
731 2002. Exposure of cells to static magnetic field accelerates loss of integrity of plasma membrane  
732 during apoptosis. *Cytometry*, 49, 113-118.
- 733 Ueno, S., Lövsund, P. & Öberg, P. Å. 1986. Effects of alternating magnetic fields and low-frequency electric  
734 currents on human skin blood flow. *Medical and Biological Engineering and Computing*, 24, 57-  
735 61.
- 736 Vidal-Gadea, A., Bainbridge, C., Clites, B., Palacios, B. E., Bakhtiari, L., Gordon, V. & Pierce-Shimomura, J.  
737 2018. Response to comment on "Magnetosensitive neurons mediate geomagnetic orientation in  
738 *Caenorhabditis elegans*". *eLife*, 7, e31414.
- 739 Vidal-Gadea, A., Ward, K., Beron, C., Ghorashian, N., Gokce, S., Russell, J., Truong, N., Parikh, A., Gadea,  
740 O., Ben-Yakar, A., Pierce-Shimomura, J. 2015. Magnetosensitive neurons mediate geomagnetic  
741 orientation in *Caenorhabditis elegans*. *Elife*, 4.
- 742 Wang, L., Du, H., Guo, X., Wang, X., Wang, M., Wang, Y., Wang, M., Chen, S., Wu, L. & Xu, A. 2015.  
743 Developmental abnormality induced by strong static magnetic field in *Caenorhabditis elegans*.  
744 *Bioelectromagnetics*, 36, 178-189.
- 745 Wang, L., Wang, M., Du, H., Liu, Y. & Xu, A. 2017. Lipid Metabolism was Interfered by Phosphatidylcholine-  
746 Coated Magnetic Nanoparticles in *C. elegans* Exposed to 0.5 T Static Magnetic Field. *Journal of*  
747 *Nanoscience and Nanotechnology*, 17, 3172-3180.
- 748 Ward, A., Liu, J., Feng, Z. & Shawn Xu, X. Z. 2008. Light-sensitive neurons and channels mediate phototaxis  
749 in *C. elegans*. *Nature neuroscience*, 11, 916-922.
- 750 Wu, Q., Li, Y., Tang, M. & Wang, D. 2012. Evaluation of Environmental Safety Concentrations of DMSA  
751 Coated Fe(2)O(3)-NPs Using Different Assay Systems in Nematode *Caenorhabditis elegans*. *PLoS*  
752 *ONE*, 7, e43729.
- 753 Yang, Y.-F., Lin, Y.-J. & Liao, C.-M. 2017. Toxicity-based toxicokinetic/toxicodynamic assessment of  
754 bioaccumulation and nanotoxicity of zerovalent iron nanoparticles in *Caenorhabditis elegans*.  
755 *International Journal of Nanomedicine*, 12, 4607-4621.
- 756 Yemini, E., Jucikas, T., Grundy, L. J., Brown, A. E. X. & Schafer, W. R. 2013. A database of *C. elegans*  
757 behavioral phenotypes. *Nature methods*, 10, 877-879.
- 758 Zablotskii, V., Polyakova, T., Lunov, O. & Dejneka, A. 2016. How a High-Gradient Magnetic Field Could  
759 Affect Cell Life. *Scientific Reports*, 6, 37407.

760 Zablotskii, V., Syrovets, T., Schmidt, Z. W., Dejneka, A. & Simmet, T. 2014. Modulation of monocytic  
761 leukemia cell function and survival by high gradient magnetic fields and mathematical modeling  
762 studies. *Biomaterials*, 35, 3164-3171.

763

764

## 765 **Figure and Table Legends**

766 **Fig. 1: Experimental set up.** A: Parts of the experimental set up for the application of gradient  
767 magnetic field on freely moving *C. elegans*. 1: Objective lens and camera; 2: Electromagnets; 3:  
768 NGM plate with freely moving wild type N2 *C. elegans*, with schematic of plate orientation, red  
769 lines indicating x, y, and z axes; 4: Auxiliary transparent base; 5: Working stage with bright light  
770 source; 6: Power Supply; 7: Computer and recording software. Objects are not depicted in scale.  
771 B: Schematic of the orientation of the NGM plate (pink circle), x, y, and z axes and electromagnets  
772 (grey rectangles), top: view from above, bottom: view from aside.

773

774 **Fig. 2: COMSOL Multiphysics simulation results for the magnetic field generated by the**  
775 **electromagnets.** A: Overview of the magnetic field flux density on the plane of the worm plate  
776 surface. The arrows show the direction of the magnetic flux. B: The magnetic field flux density  
777 distribution on the worm plate surface. The arrows indicate the direction of the magnetic field (the  
778 component of the magnetic field in the perpendicular direction is set equal to zero to avoid arrows  
779 going in/out of the plane). C: The magnetic forces applied on particles located on the plane of the  
780 worm plate surface. The arrows show the direction of the magnetic forces (the component of the  
781 force in the perpendicular direction is set equal to zero to avoid arrows going in/out of the plane).  
782 D: The gradient of the magnetic field in the direction of the axis that connects the centers of the  
783 two electromagnets.

784

785 **Fig. 3: Characterization of the magnetic field around the 1 $\mu$ m nanoparticles for two**  
786 **different configurations.** The direction of magnetic moment for both configurations is along the  
787 x axis, as is shown in Figure 1. The magnetic moment of the particles is assumed to be similar  
788 and equal to the maximum value that is computed from the COMSOL Multiphysics simulations in  
789 the plate. A: The magnetic field flux density around three paramagnetic particles in the vertical  
790 configuration, i.e. along the y axis. The arrows indicate the direction of the magnetic field. B: The  
791 largest component of the gradient of the magnetic field for the vertical configuration of the  
792 paramagnetic particles. C: The magnetic field flux density norm around three paramagnetic



793 particles in the horizontal configuration, i.e. along the x axis. The arrows indicate the direction of  
794 the magnetic field. D: The largest component of the gradient of the magnetic field for the horizontal  
795 configuration of the paramagnetic particles. E: The forces between two particles in each  
796 configuration. F: The magnetic moment of the external magnetic field, which the particles  
797 experience once inside the magnetic field.

798

799 **Table 1:** Groups of worms tested and properties of the respective nanoparticles.

800

801 **Fig. 4: Confirmation of nanoparticles uptake in young adult *C. elegans*.** A: Internalization of  
802 1  $\mu\text{m}$  paramagnetic particles is verified by bright field microscopy. Left: worm fed with plain *E. coli*  
803 OP50 (control, Group C). Right: worm fed with *E. coli* OP50 mixed with 1 $\mu\text{m}$  particles. Particles  
804 appear to be aggregated in the dark-colored pharynx (PHX) and intestine (INT) of Group 1 worms,  
805 in contrast to the light-colored pharynx (PHX) and intestine (INT) of Group C worms. Scale bar:  
806 0.1mm. B: Internalization of 100 nm magnetic, fluorescent nanoparticles is verified by  
807 epifluorescent microscopy. Top panels: worm fed with plain *E. coli* OP50 (control, Group C),  
808 bottom panels: worm fed with *E. coli* OP50 mixed with 100 nm particles. Bright light: worms  
809 illuminated by bright light source; rhodamine: worms visualized with optical filter for rhodamine,  
810 Excitation 545 nm/Emission 565 nm; GFP: worms visualized with optical filter for green  
811 fluorescent protein (GFP), Excitation 395 nm/Emission 510 nm; DAPI: worms visualized with  
812 optical filter for DAPI, Excitation 358 nm/Emission 460 nm. In GFP and DAPI images,  
813 autofluorescence is the only fluorescence detected. Scale bar: 0.1 mm. C: Internalization of 40  
814 nm paramagnetic particles is verified by scanning electron microscopy (SEM). Left: a whole *C.*  
815 *elegans* as captured by SEM, using Everhart-Thornley SE detector. Center: 40 nm particles,  
816 shown as white dots, detected close to *C. elegans* pharynx, using circular backscatter (CBS)  
817 detector, magnification 1500x. Right: 40 nm particles, shown as white dots, detected close to *C.*  
818 *elegans* pharynx, using circular backscatter (CBS) detector, magnification 3000x. Location of  
819 particles is approximate, due to distortion generated during sample processing.

820

821 **Fig. 5: Location of nanoparticles in young adult *C. elegans*, using Transmission Electron**  
822 **Microscopy (TEM).** A-B-C: Free particles (A: 100 nm, B: 1  $\mu\text{m}$ , C: 40 nm) imaged with TEM; D:  
823 40 nm particles aggregates in the intestine; E: 100 nm particles aggregates in the intestine lumen;  
824 F: 40 nm particles aggregate in body muscle tissue (m.t.), close to epidermis (e) and cuticle (c).  
825 Dotted circles indicate particles aggregates in all panels.

826

827 **Fig. 6: Locomotion features and their metrics, as they have been quantified for all four**  
828 **groups of worms tested** (Group C: control animals, fed on plain food source *E. coli* OP50, n=29;  
829 Group 1: fed on *E. coli* OP50 mixed with 1  $\mu\text{m}$ -diameter paramagnetic particles, n=33; Group 100:  
830 fed on *E. coli* OP50 mixed with 100 nm-diameter iron core paramagnetic particles, n=38; and  
831 Group 40: fed on *E. coli* OP50 mixed with 40 nm-diameter iron core paramagnetic particles, n=42)  
832 in the absence (OFF state) or in the presence (ON state) of external magnetic field. A-B: Posture  
833 features, C-I: Motion features, J-M: Path features. For each group tested worms were tracked in  
834 3 different experimental days. Grey dots represent individual worms; red diamonds represent the  
835 mean; blue boxes indicate the median confidence interval box, with a middle line indicating the  
836 median. Dashed lines show comparisons between worms of different groups in the absence of  
837 magnetic field (OFF state). Continuous lines show comparisons between the ON and OFF state  
838 of worms of the same group. All  $p$ -values given are calculated by the Wilcoxon Signed Rank test  
839 with confidence interval set at 95%, and any difference was considered statistically significant  
840 when  $p \leq 0.05$ . The  $p$ -values for all comparisons are given in Tables S1 and S2.

841  
842 **Fig. S1:** Calibration of the parameters in COMSOL Multiphysics simulations to match the available  
843 data for magnet 1 (A) and magnet 2 (B) that are used in the experiments.

844  
845 **Fig. S2:** An overview of the steps that are taken to analyze the locomotion of the worms. Top to  
846 bottom: A worm is selected in the first frame to be tracked. Next, several image enhancements  
847 are performed on the subframe that is created around the selected worm. Next, the grayscale  
848 image is converted to a binary image and postprocessing, e.g. finding the centroid (blue circle) of  
849 the worm, is performed. All these steps are conducted for the whole movie that is recorded.  
850 Finally, the data collected from all experiments are compared.

851  
852 **Fig. S3:** All the components of the gradient of the magnetic field for the particles in the vertical  
853 (along the y axis) and horizontal (along the x axis) configuration.

854  
855 **Fig. S4:** The supplementary angle ( $\alpha$ ) is the difference in tangent angles at each skeleton point.

856  
857 **Table S1:** The magnetic field effect on the locomotion of worms with internalized nanoparticles.  
858  $p$ -values of Wilcoxon Signed Rank test for all comparisons between OFF and ON state of each  
859 group studied. With bold are highlighted the statistically significant differences, with  $p$ -value  
860  $\leq 0.05$ .

861

862 **Table S2:** The particle effect on the locomotion of worms with internalized nanoparticles. In the  
863 second column are given the  $p$ -values of Kruskal-Wallis test used to compare all groups of worms  
864 studied during their OFF state. In the last three columns are given the  $p$ -values of the Wilcoxon  
865 Signed Rank test used to compare Group C with each of the other three particle-containing  
866 groups. The Wilcoxon Signed Rank test was run only when Kruskal-Wallis test gave a  $p$ -value  
867  $\leq 0.05$ . With bold are highlighted the statistically significant differences, with  $p$ -value  $\leq 0.05$ .

868

869 **Fig. S5:** Power analysis for locomotion dynamics experiments. G\*Power open source software  
870 was used as described in Methods. A. Plot that shows the probability of detecting a real effect  
871 with regard to sample size; B. Table showing the protocol followed for the power analysis. The  
872 mean of group1 was set to 0.5 and the mean of group2 was set to 0.4, with SD within each group  
873  $\sigma=0.1$ .

Figure 1

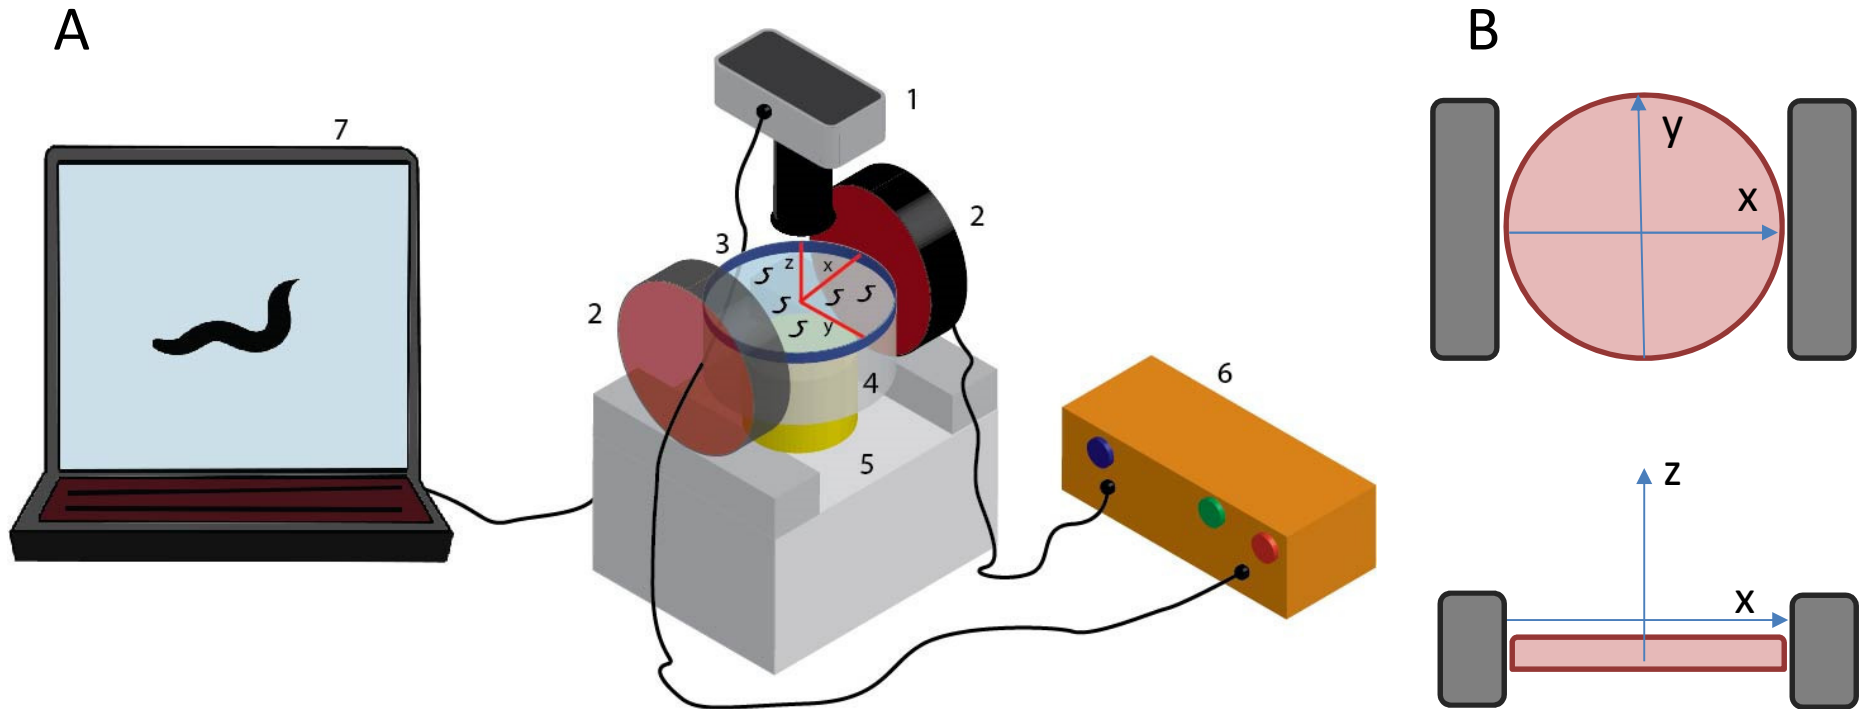

**Fig. 1: Experimental set up.** A: Parts of the experimental set up for the application of gradient magnetic field on freely moving *C. elegans*. 1: Objective lens and camera; 2: Electromagnets; 3: NGM plate with freely moving wild type N2 *C. elegans*, with schematic of plate orientation, red lines indicating x, y, and z axes; 4: Auxiliary transparent base; 5: Working stage with bright light source; 6: Power Supply; 7: Computer and recording software. Objects are not depicted in scale. B: Schematic of the orientation of the NGM plate (pink circle), x, y, and z axes and electromagnets (grey rectangles), top: view from above, bottom: view from aside.

# Figure 2

Magnetic flux density norm [G]

A

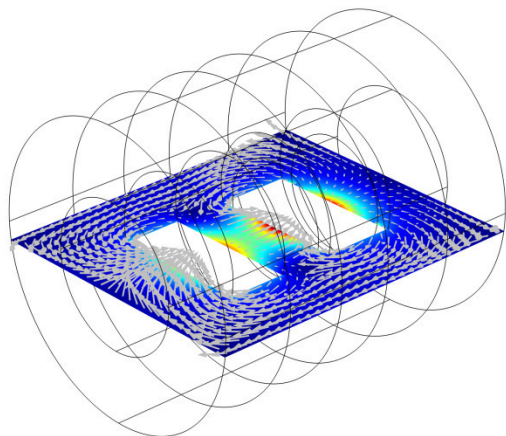

B

Magnetic flux density norm [G]

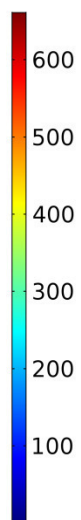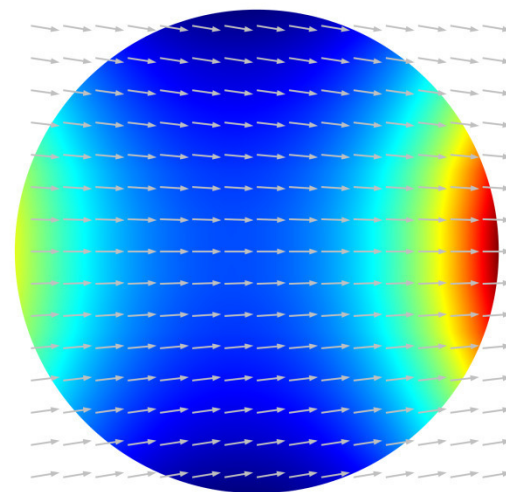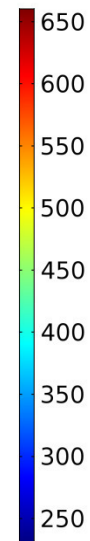

C

Force [pN]

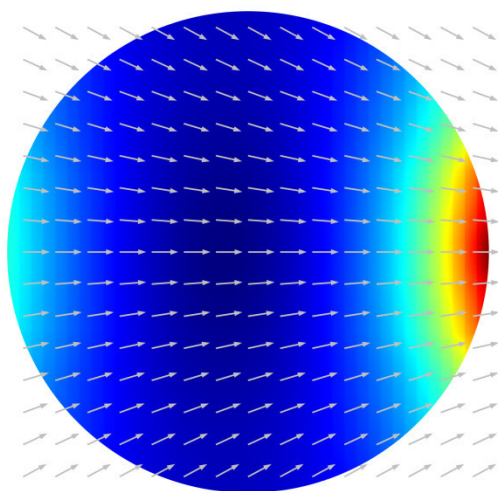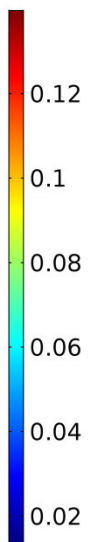

D

B<sub>xx</sub> [T/m]

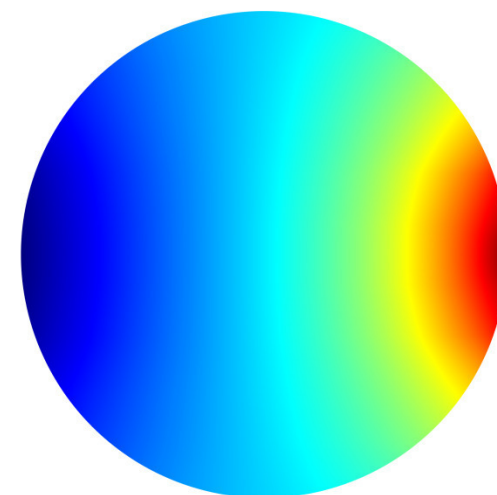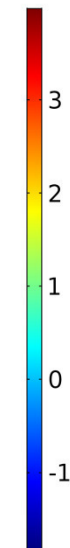

**Fig. 2: COMSOL Multiphysics simulation results for the magnetic field generated by the electromagnets.** A: Overview of the magnetic field flux density on the plane of the worm plate surface. The arrows show the direction of the magnetic flux. B: The magnetic field flux density distribution on the worm plate surface. The arrows indicate the direction of the magnetic field (the component of the magnetic field in the perpendicular direction is set equal to zero to avoid arrows going in/out of the plane). C: The magnetic forces applied on particles located on the plane of the worm plate surface. The arrows show the direction of the magnetic forces (the component of the force in the perpendicular direction is set equal to zero to avoid arrows going in/out of the plane). D: The gradient of the magnetic field in the direction of the axis that connects the centers of the two electromagnets.

Figure 3

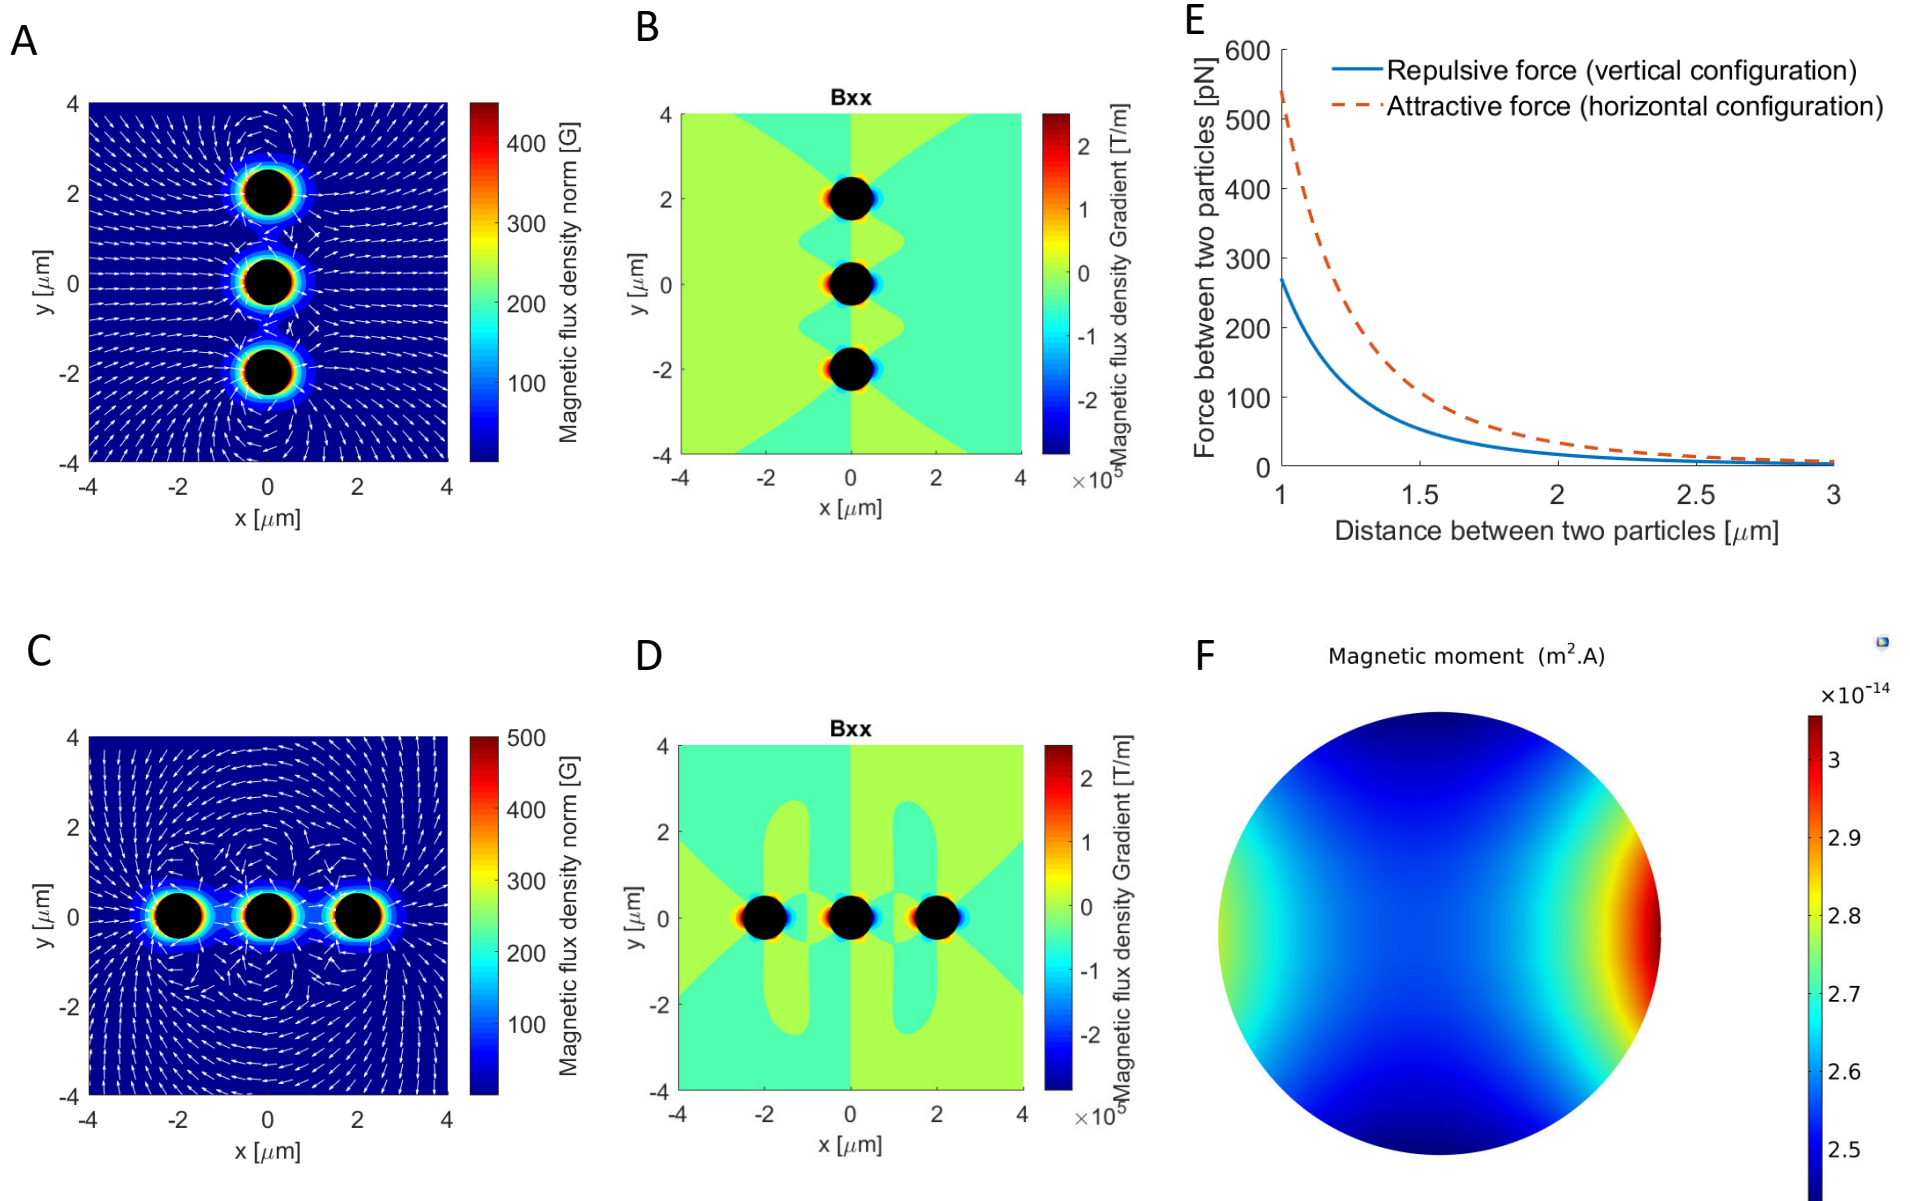

**Fig. 3: Characterization of the magnetic field around the 1 $\mu$ m nanoparticles for two different configurations.** The direction of magnetic moment for both configurations is along the x axis, as is shown in Figure 1. The magnetic moment of the particles is assumed to be similar and equal to the maximum value that is computed from the COMSOL Multiphysics simulations in the plate. A: The magnetic field flux density around three paramagnetic particles in the vertical configuration, i.e. along the y axis. The arrows indicate the direction of the magnetic field. B: The largest component of the gradient of the magnetic field for the vertical configuration of the paramagnetic particles. C: The magnetic field flux density norm around three paramagnetic particles in the horizontal configuration, i.e. along the x axis. The arrows indicate the direction of the magnetic field. D: The largest component of the gradient of the magnetic field for the horizontal configuration of the paramagnetic particles. E: The forces between two particles in each configuration. F: The magnetic moment of the external magnetic field, which the particles experience once inside the magnetic field.



| <b>Group</b> | <b>Particle Size</b> | <b>Coating</b> | <b>Magnetic properties</b> | <b>Fluorescence</b> |
|--------------|----------------------|----------------|----------------------------|---------------------|
| Group C      | -                    | -              | -                          | -                   |
| Group 1      | 1 $\mu$ m            | Streptavidin   | Paramagnetic               | No                  |
| Group 100    | 100 nm               | No             | Paramagnetic               | Rhodamine           |
| Group 40     | 40 nm                | -COOH          | Paramagnetic               | No                  |

**Table 1:** Groups of worms tested and properties of the respective nanoparticles.

Figure 4

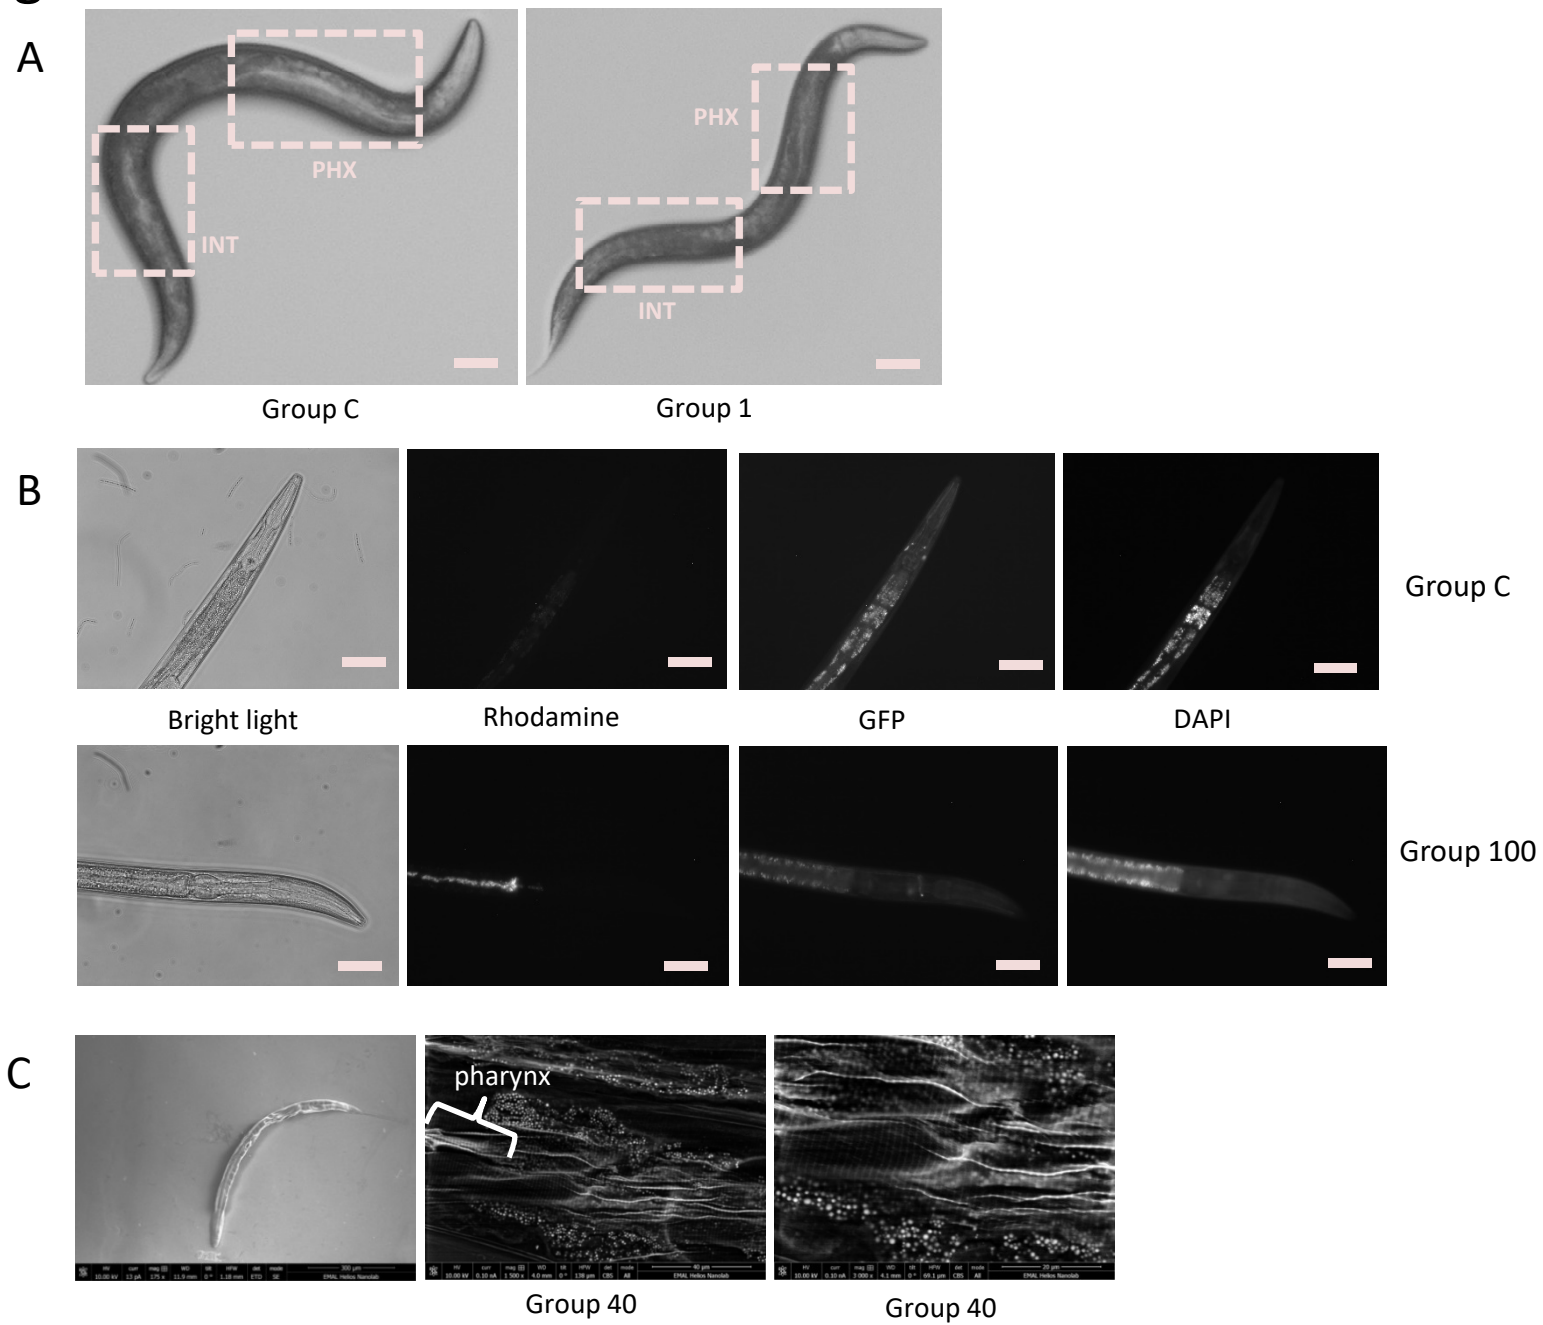

**Fig. 4: Confirmation of nanoparticles uptake in young adult *C. elegans*.** A: Internalization of 1  $\mu\text{m}$  paramagnetic particles is verified by bright field microscopy. Left: worm fed with plain *E. coli* OP50 (control, Group C). Right: worm fed with *E. coli* OP50 mixed with 1 $\mu\text{m}$  particles. Particles appear to be aggregated in the dark-colored pharynx (PHX) and intestine (INT) of Group 1 worms, in contrast to the light-colored pharynx (PHX) and intestine (INT) of Group C worms. Scale bar: 0.1mm. B: Internalization of 100 nm magnetic, fluorescent nanoparticles is verified by epifluorescent microscopy. Top panels: worm fed with plain *E. coli* OP50 (control, Group C), bottom panels: worm fed with *E. coli* OP50 mixed with 100 nm particles. Bright light: worms illuminated by bright light source; rhodamine: worms visualized with optical filter for rhodamine, Excitation 545 nm/Emission 565 nm; GFP: worms visualized with optical filter for green fluorescent protein (GFP), Excitation 395 nm/Emission 510 nm; DAPI: worms visualized with optical filter for DAPI, Excitation 358 nm/Emission 460 nm. In GFP and DAPI images, autofluorescence is the only fluorescence detected. Scale bar: 0.1 mm. C: Internalization of 40 nm paramagnetic particles is verified by scanning electron microscopy (SEM). Left: a whole *C. elegans* as captured by SEM, using Everhart-Thornley SE detector. Center: 40 nm particles, shown as white dots, detected close to *C. elegans* pharynx, using circular backscatter (CBS) detector, magnification 1500x. Right: 40 nm particles, shown as white dots, detected close to *C. elegans* pharynx, using circular backscatter (CBS) detector, magnification 3000x. Location of particles is approximate, due to distortion generated during sample processing.

Figure 5

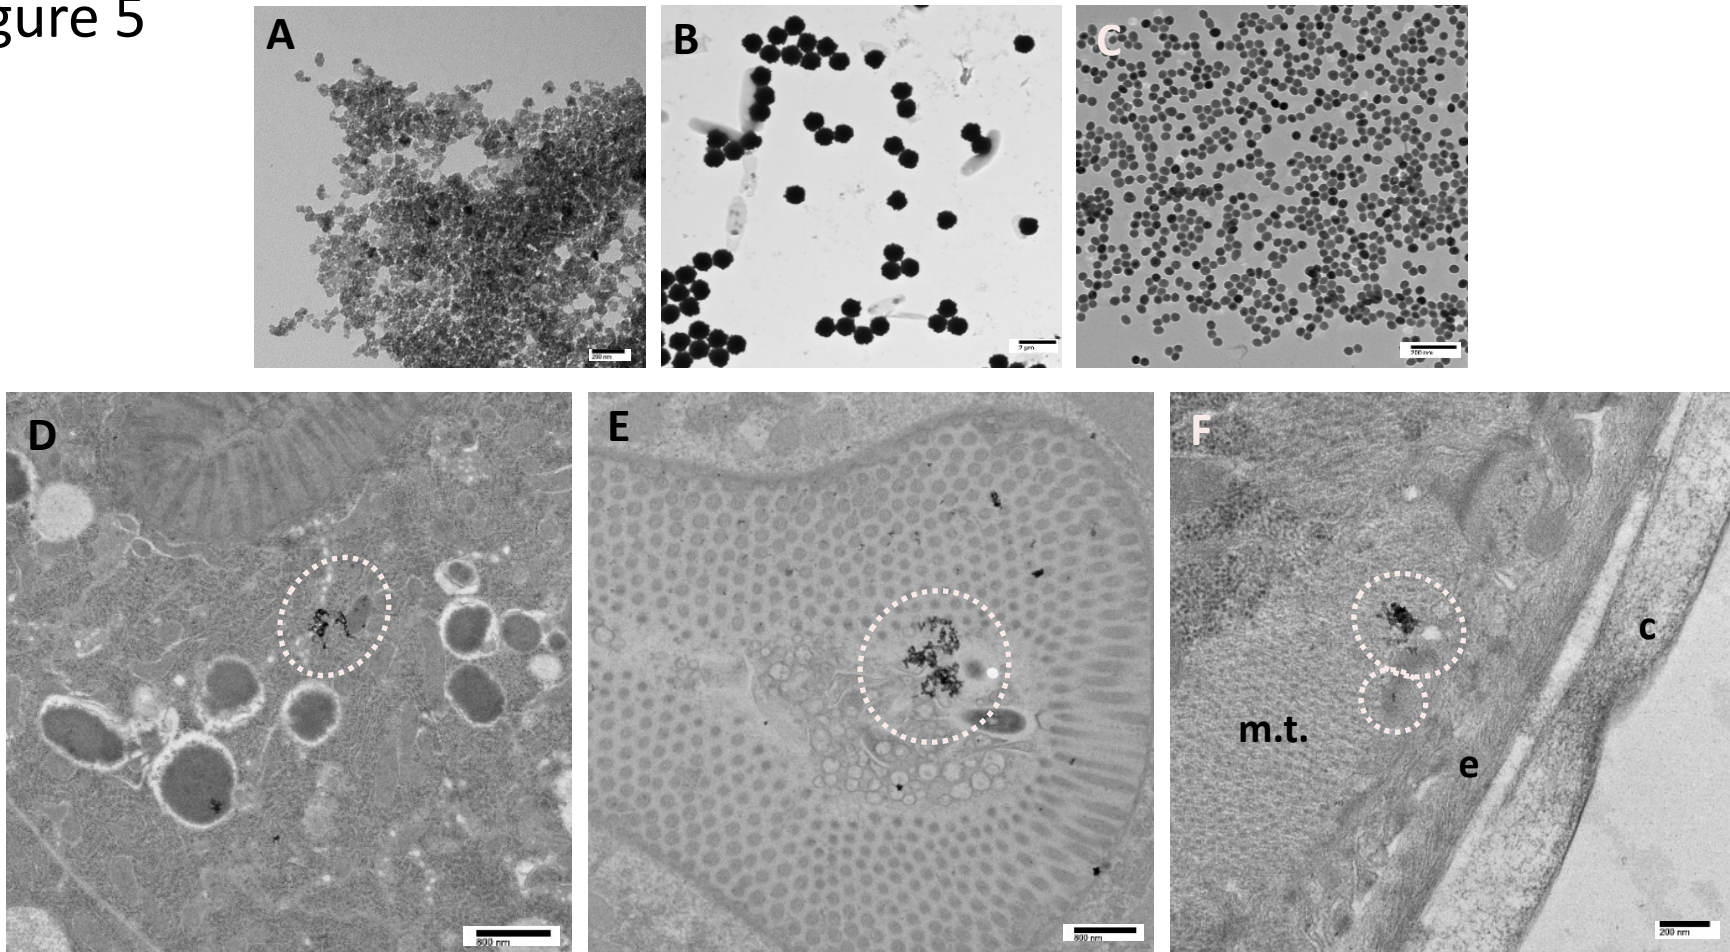

**Fig. 5: Location of nanoparticles in young adult *C. elegans*, using Transmission Electron Microscopy (TEM).** A-B-C: Free particles (A: 100 nm, B: 1  $\mu$ m, C: 40 nm) imaged with TEM; D: 40 nm particles aggregates in the intestine; E: 100 nm particles aggregates in the intestine lumen; F: 40 nm particles aggregate in body muscle tissue (m.t.), close to epidermis (e) and cuticle (c). Dotted circles indicate particles aggregates in all panels.

# Figure 6

## Posture Features (A-B)

A

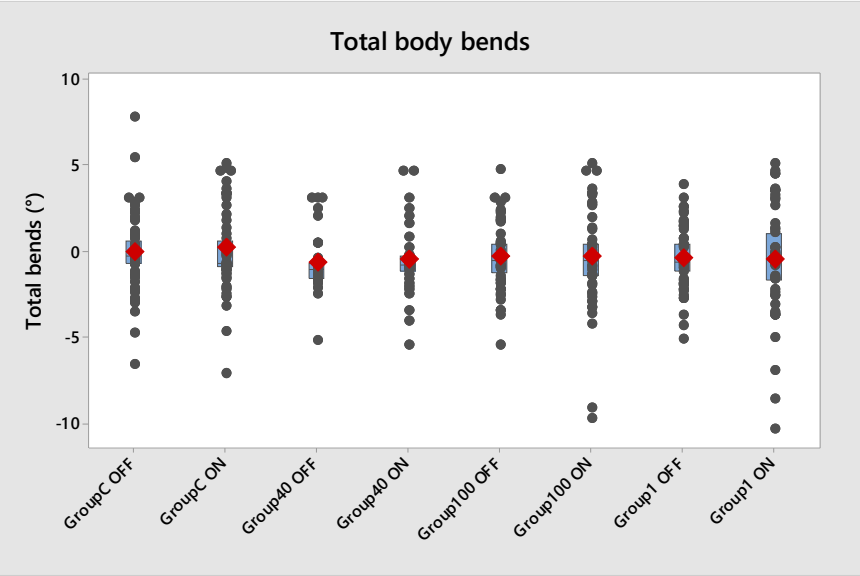

B

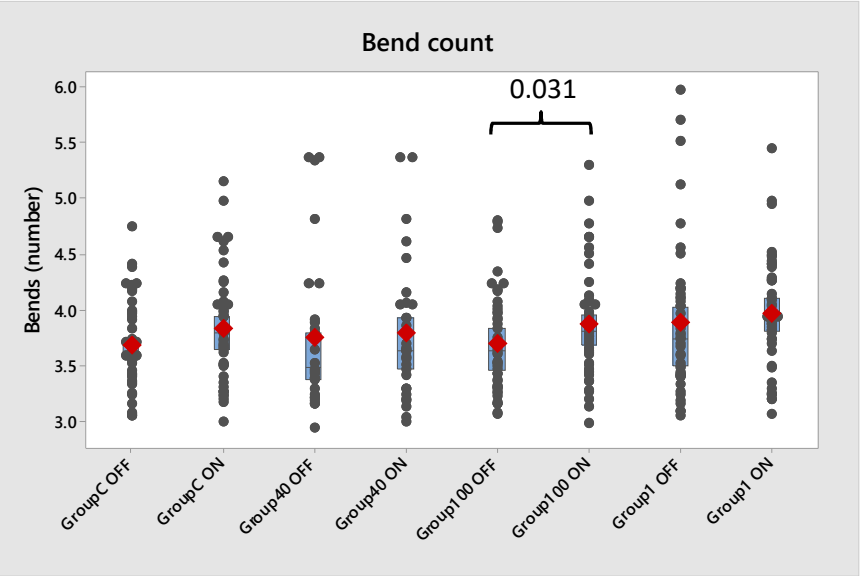

# Figure 6 (continued)

## Motion Features (C-I)

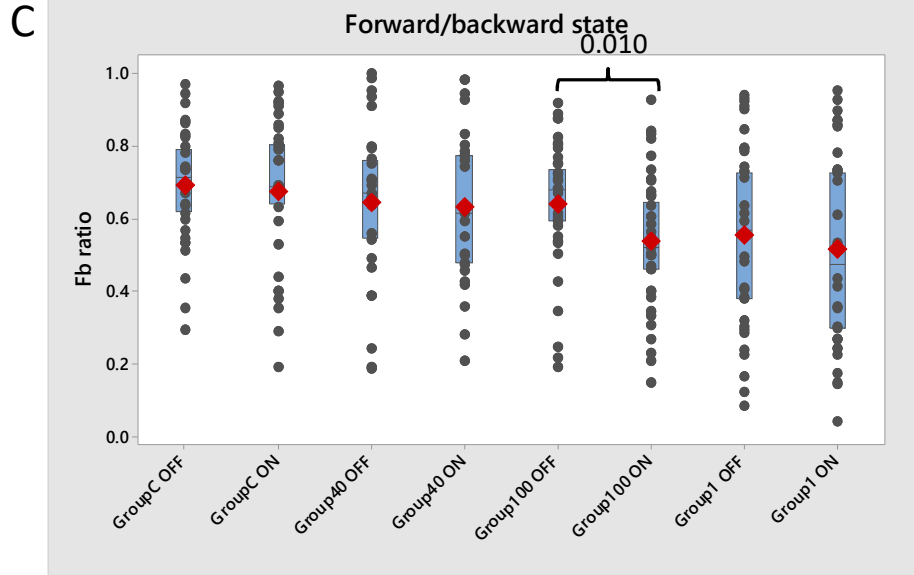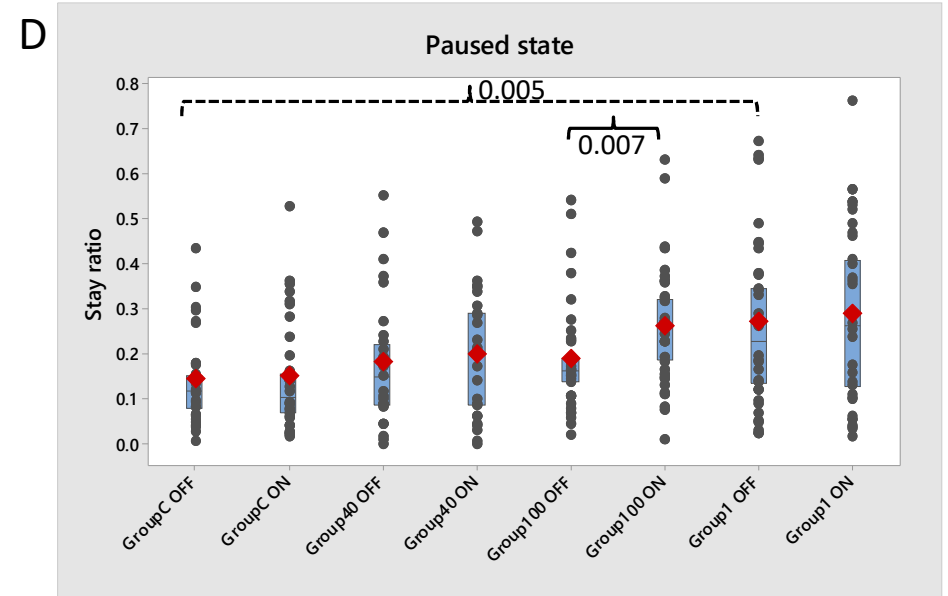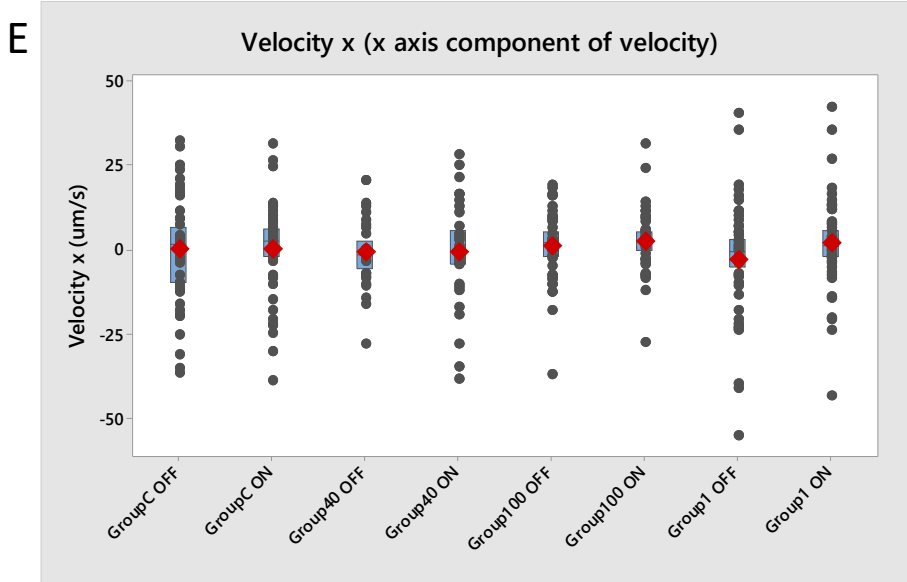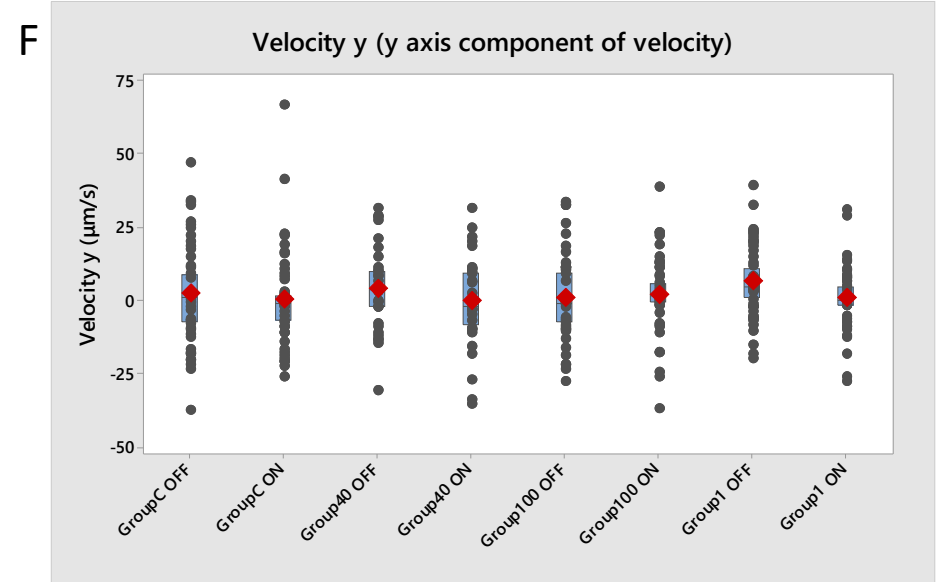

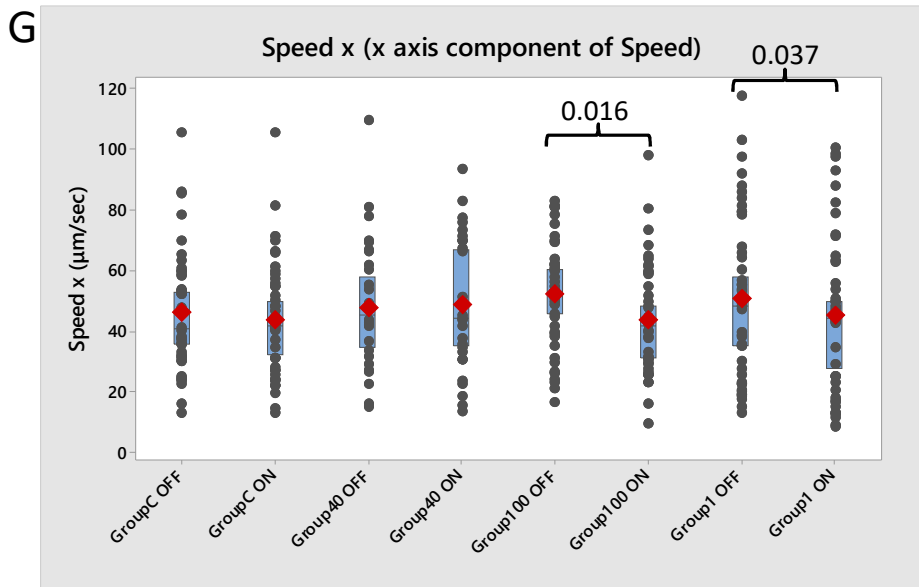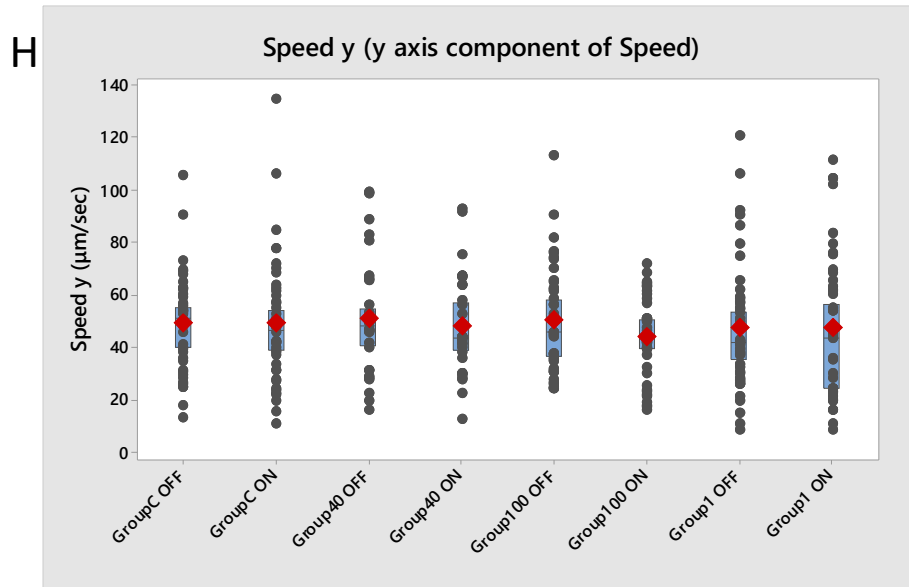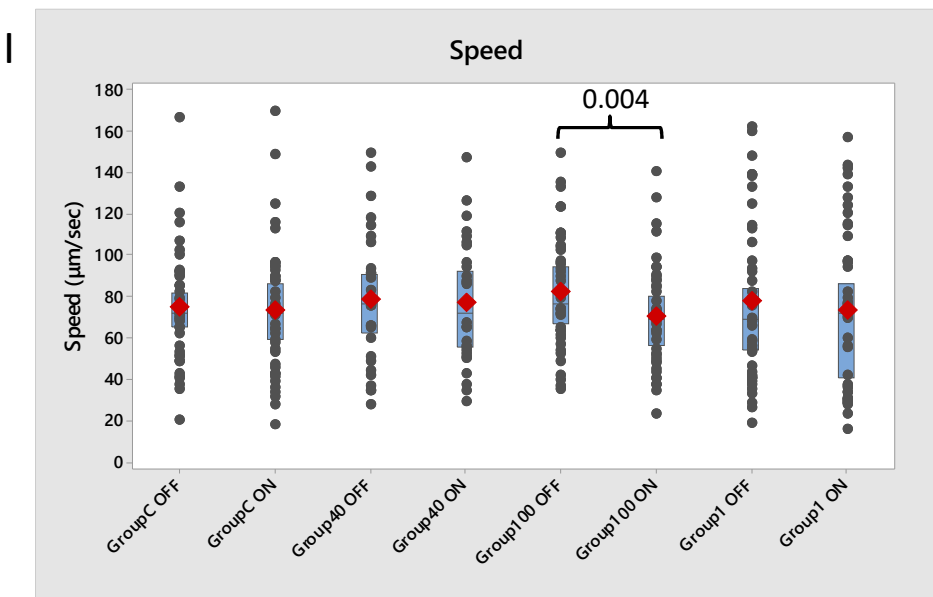

# Figure 6 (continued)

## Path Features (J-M)

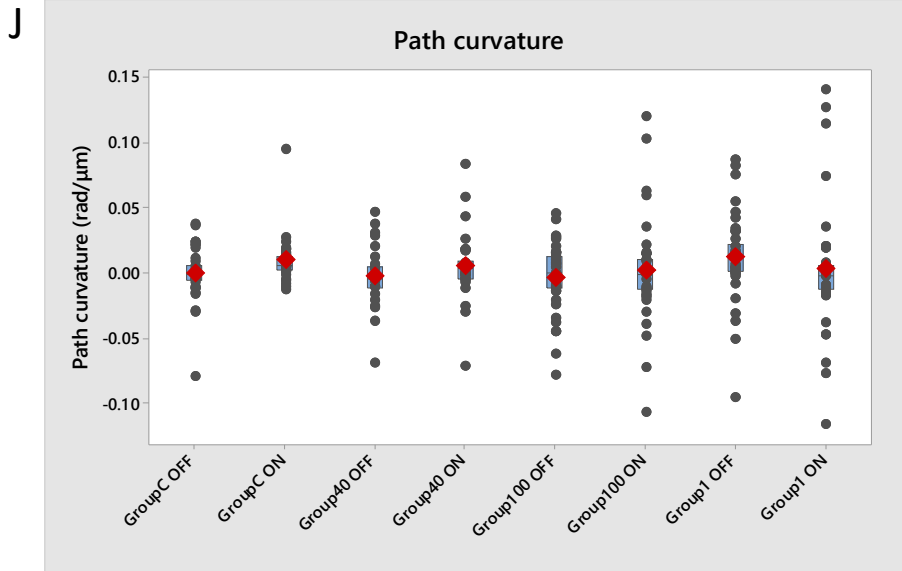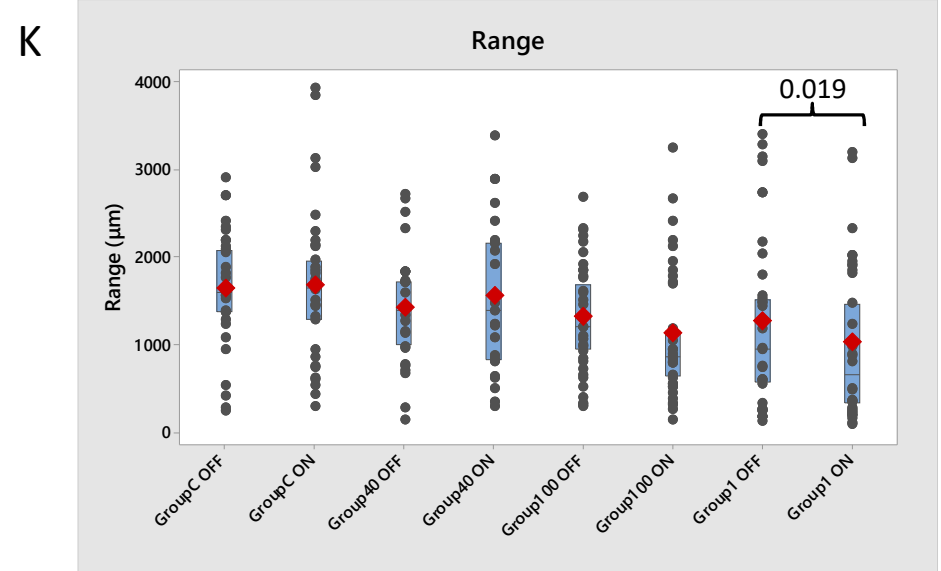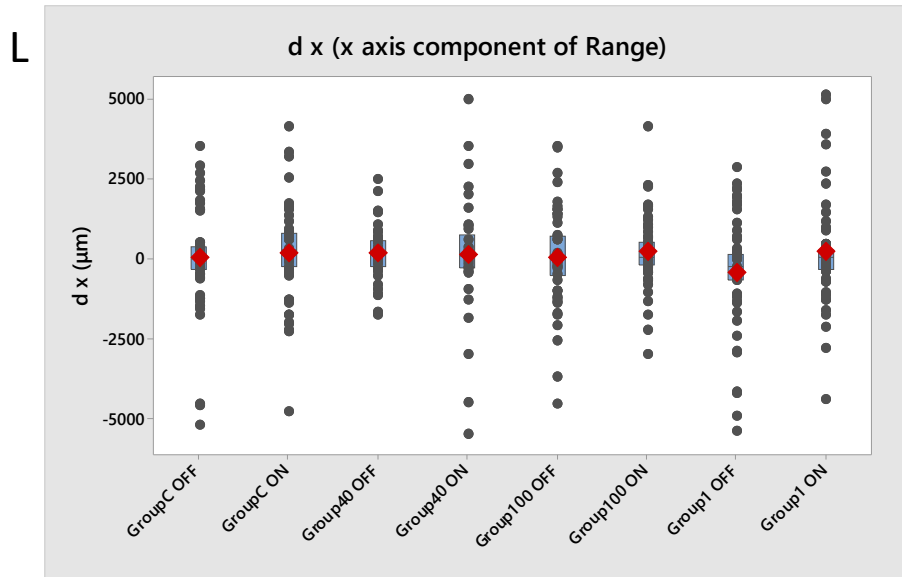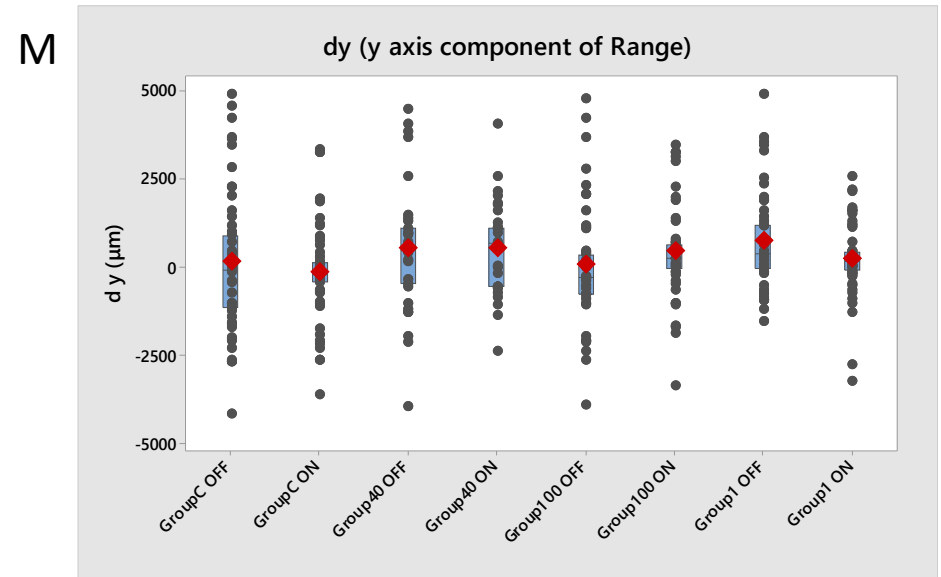



**Fig. 6: Locomotion features and their metrics, as they have been quantified for all four groups of worms tested** (Group C: control animals, fed on plain food source *E. coli* OP50, n=29; Group 1: fed on *E. coli* OP50 mixed with 1  $\mu\text{m}$ -diameter paramagnetic particles, n=33; Group 100: fed on *E. coli* OP50 mixed with 100 nm-diameter iron core paramagnetic particles, n=38; and Group 40: fed on *E. coli* OP50 mixed with 40 nm-diameter iron core paramagnetic particles, n=42) in the absence (OFF state) or in the presence (ON state) of external magnetic field. A-B: Posture features, C-I: Motion features, J-M: Path features. For each group tested worms were tracked in 3 different experimental days. Grey dots represent individual worms; red diamonds represent the mean; blue boxes indicate the median confidence interval box, with a middle line indicating the median. Dashed lines show comparisons between worms of different groups in the absence of magnetic field (OFF state). Continuous lines show comparisons between the ON and OFF state of worms of the same group. All *p*-values given are calculated by the Wilcoxon Signed Rank test with confidence interval set at 95%, and any difference was considered statistically significant when  $p \leq 0.05$ . The *p*-values for all comparisons are given in Tables S1 and S2.

## Supplementary Figures and Tables

---

# Figure S1

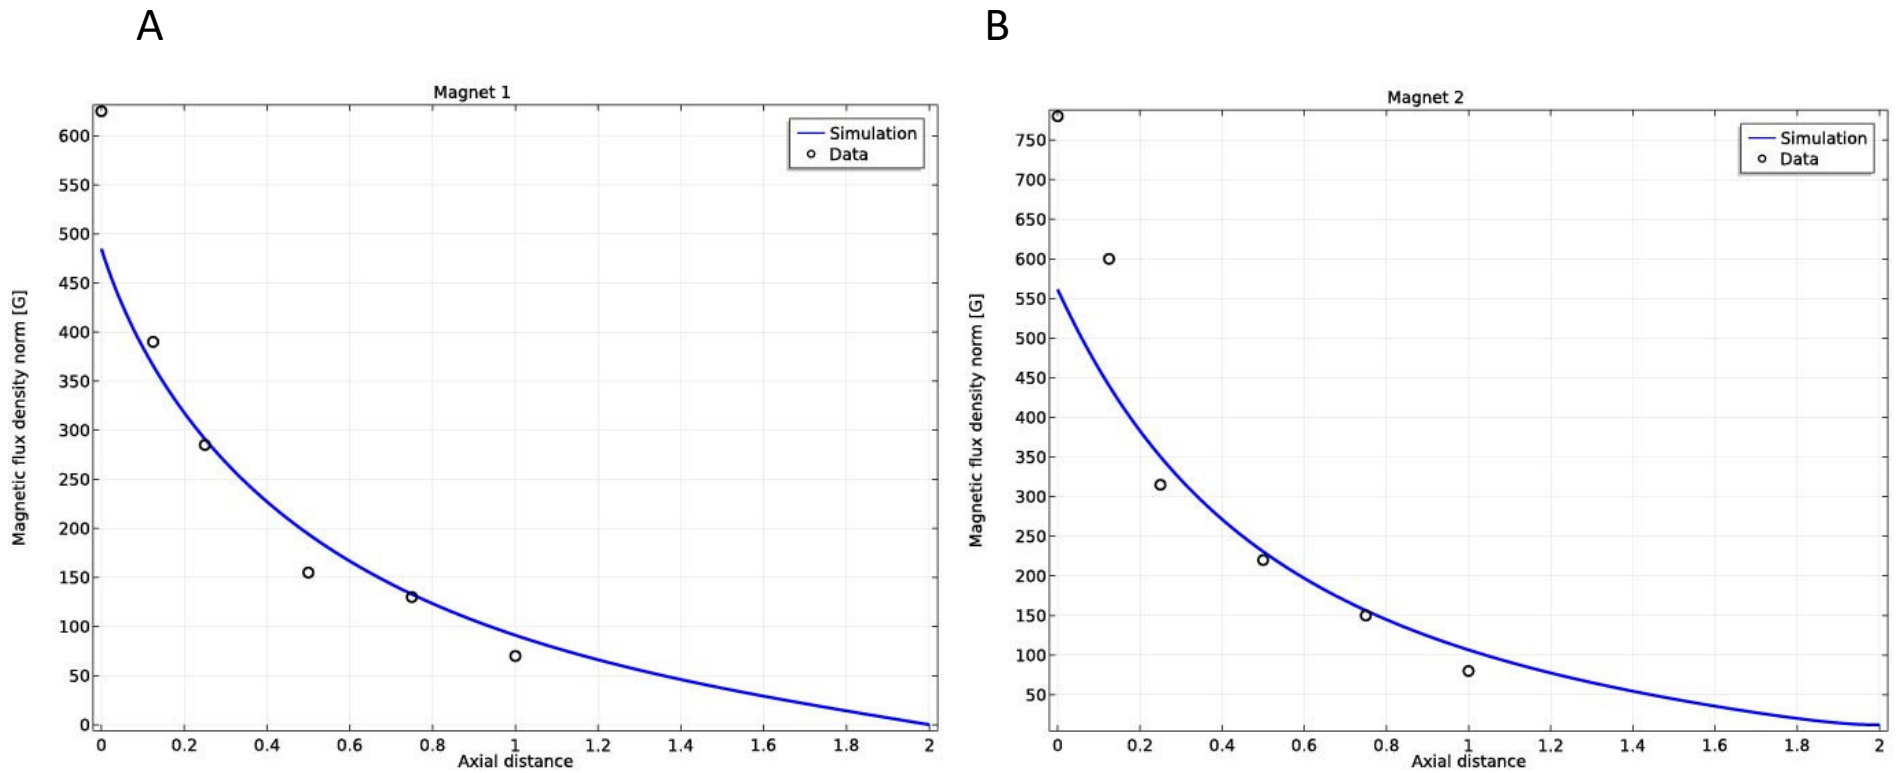

**Fig. S1:** Calibration of the parameters in COMSOL Multiphysics simulations to match the available data for magnet 1 (A) and magnet 2 (B) that are used in the experiments.

Figure S2

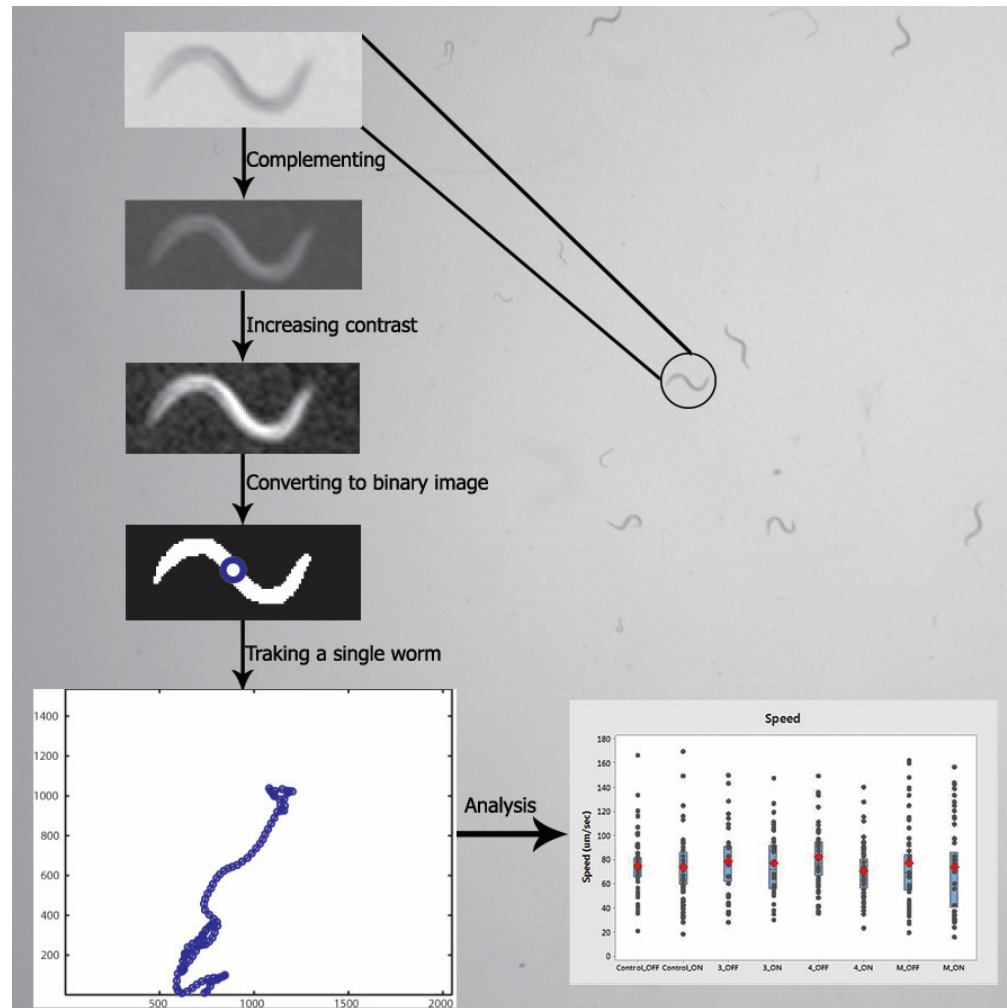

**Fig. S2:** An overview of the steps that are taken to analyze the locomotion of the worms. Top to bottom: A worm is selected in the first frame to be tracked. Next, several image enhancements are performed on the subframe that is created around the selected worm. Next, the grayscale image is converted to a binary image and postprocessing, e.g. finding the centroid (blue circle) of the worm, is performed. All these steps are conducted for the whole movie that is recorded. Finally, the data collected from all experiments are compared.

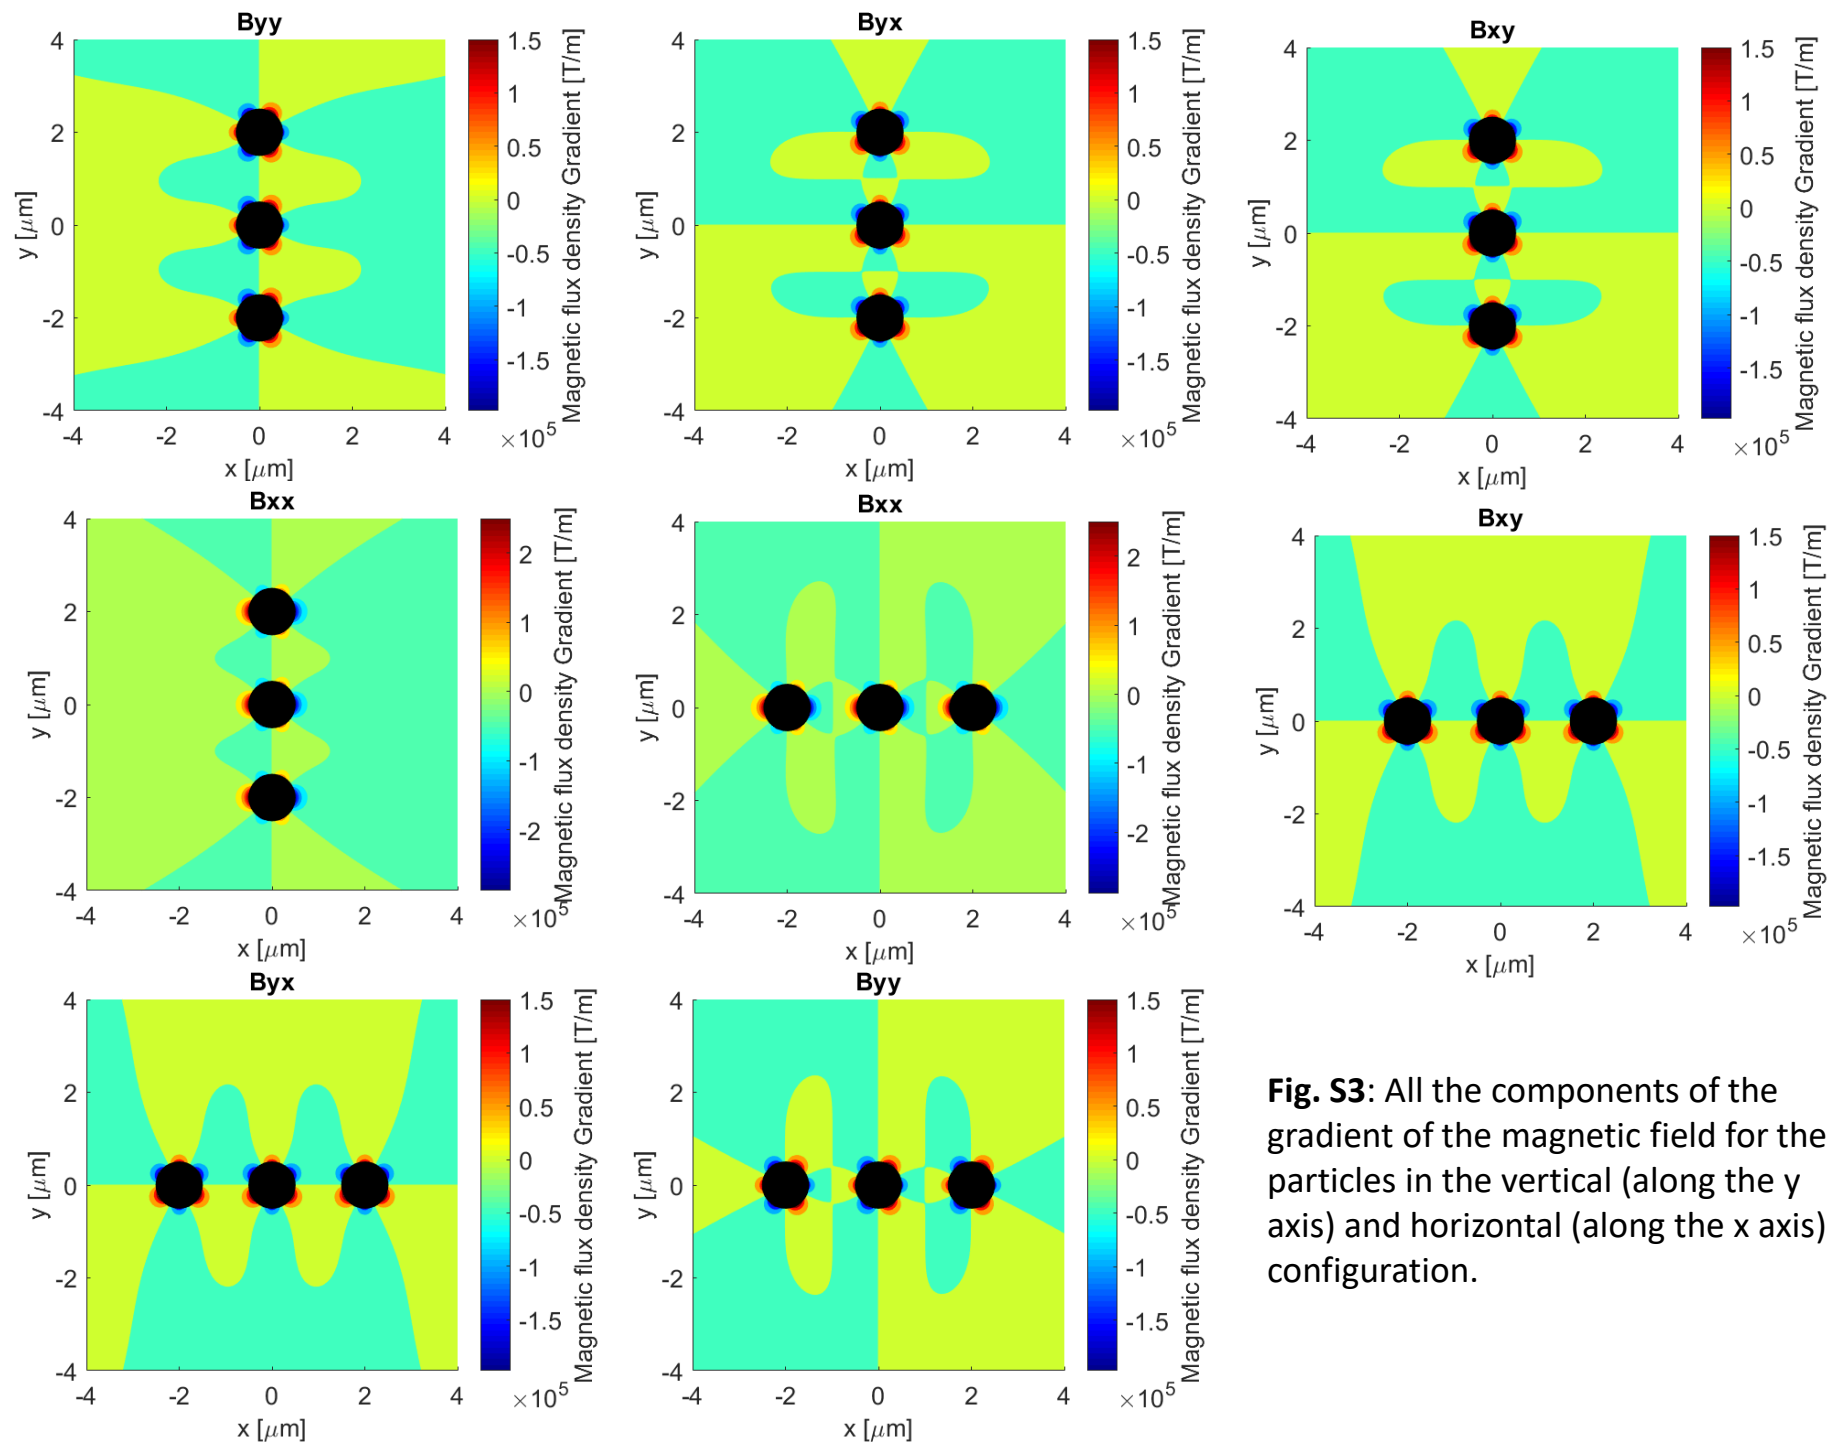

**Fig. S3:** All the components of the gradient of the magnetic field for the particles in the vertical (along the y axis) and horizontal (along the x axis) configuration.

Figure S4

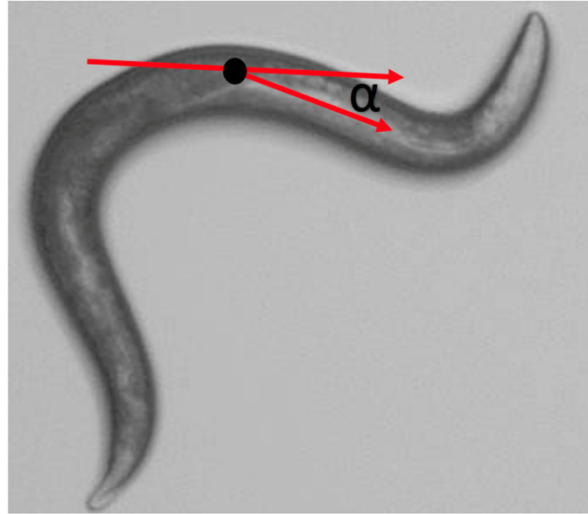

**Fig. S4:** The supplementary angle ( $\alpha$ ) is the difference in tangent angles at each skeleton point.

| Metric                 | Group C OFF/ON | Group 1 OFF/ON | Group 100 OFF/ON | Group 40 OFF/ON |
|------------------------|----------------|----------------|------------------|-----------------|
| Total bends            | 0.645          | 0.645          | 0.644            | 0.540           |
| Bend count             | 0.052          | 0.093          | <b>0.031</b>     | 0.764           |
| Forward/backward ratio | 0.681          | 0.193          | <b>0.010</b>     | 0.747           |
| Stay ratio             | 0.967          | 0.336          | <b>0.007</b>     | 0.706           |
| Velocity x             | 0.832          | 0.375          | 0.477            | 0.979           |
| Velocity y             | 0.599          | 0.066          | 0.514            | 0.375           |
| Speed x                | 0.431          | <b>0.037</b>   | <b>0.016</b>     | 0.936           |
| Speed y                | 0.235          | 0.066          | 0.093            | 0.435           |
| Speed                  | 0.438          | 0.190          | <b>0.004</b>     | 0.554           |
| Path curvature         | 0.120          | 0.059          | 0.543            | 0.225           |
| Range                  | 0.773          | <b>0.019</b>   | 0.104            | 0.706           |
| D x                    | 0.960          | 0.280          | 0.499            | 0.914           |
| D y                    | 0.626          | 0.250          | 0.217            | 0.920           |

**Table S1:** The magnetic field effect on the locomotion of worms with internalized nanoparticles. *p*-values of Wilcoxon Signed Rank test for all comparisons between OFF and ON state of each group studied. With bold are highlighted the statistically significant differences, with *p*-value  $\leq 0.05$ .

| Metric                 | Kruskal-Wallis | Group C vs Group 1 | Group C vs Group 100 | Group C vs Group 40 |
|------------------------|----------------|--------------------|----------------------|---------------------|
| Total bends            | 0.649          |                    |                      |                     |
| Bend count             | 0.237          |                    |                      |                     |
| Forward/backward ratio | 0.234          |                    |                      |                     |
| Stay ratio             | <b>0.045</b>   | <b>0.005</b>       | 0.226                | 0.064               |
| Velocity x             | 0.729          |                    |                      |                     |
| Velocity y             | 0.321          |                    |                      |                     |
| Speed x                | 0.498          |                    |                      |                     |
| Speed y                | 0.804          |                    |                      |                     |
| Speed                  | 0.661          |                    |                      |                     |
| Path curvature         | 0.096          |                    |                      |                     |
| Range                  | 0.115          |                    |                      |                     |
| D x                    | 0.649          |                    |                      |                     |
| D y                    | 0.188          |                    |                      |                     |

**Table S2:** The particle effect on the locomotion of worms with internalized nanoparticles. In the second column are given the  $p$ -values of Kruskal-Wallis test used to compare all groups of worms studied during their OFF state. In the last three columns are given the  $p$ -values of the Wilcoxon Signed Rank test used to compare Group C with each of the other three particle-containing groups. The Wilcoxon Signed Rank test was run only when Kruskal-Wallis test gave a  $p$ -value  $\leq 0.05$ . With bold are highlighted the statistically significant differences, with  $p$ -value  $\leq 0.05$ .



A

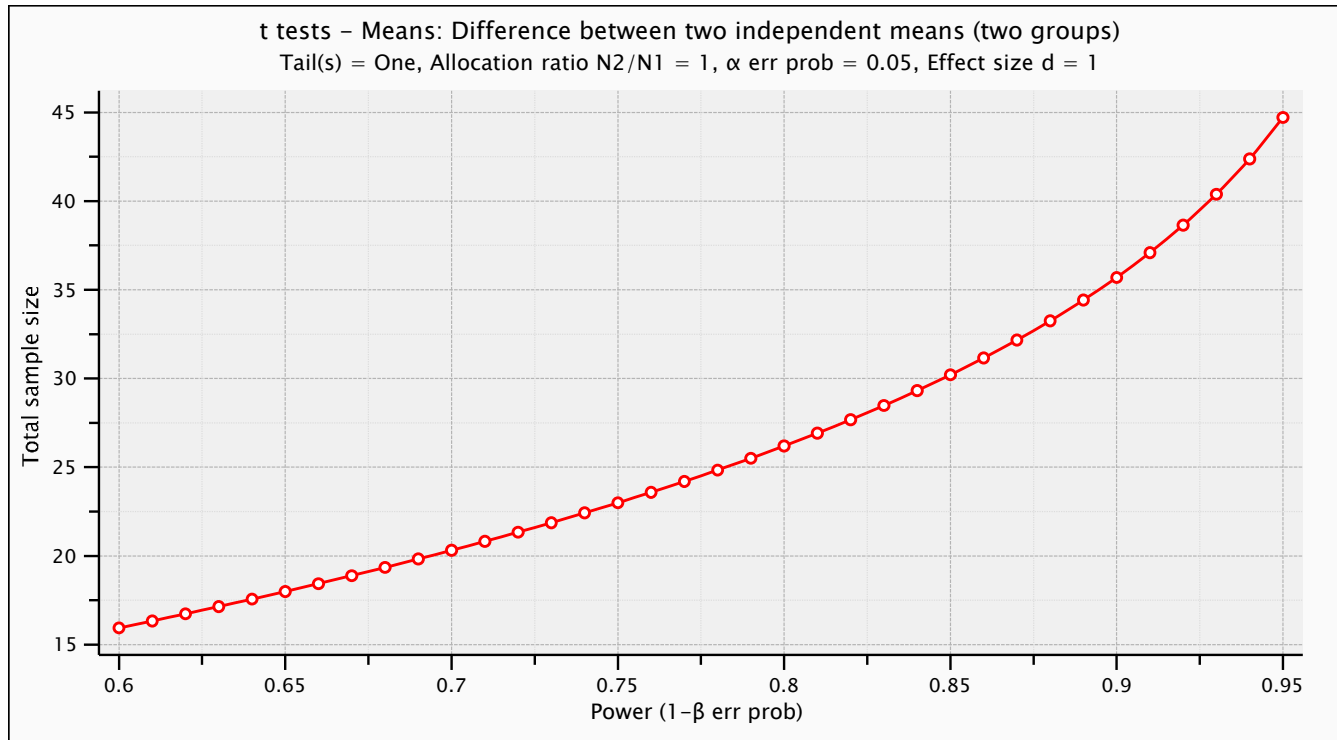

B

Analysis: A priori: Compute required sample size

Input: Tail(s) = One

Effect size  $d = 1.0000000$

$\alpha$  err prob = 0.05

Power ( $1-\beta$  err prob) = 0.95

Allocation ratio  $N2/N1 = 1$

Output: Noncentrality parameter  $\delta = 3.391165$

Critical t = 1.680230

Df = 44

Sample size group 1 = 23

Sample size group 2 = 23

Total sample size = 46

Actual power = 0.954817

**Fig. S5:** Power analysis for locomotion dynamics experiments. G\*Power open source software was used as described in Methods. A. Plot that shows the probability of detecting a real effect with regard to sample size; B. Table showing the protocol followed for the power analysis. The mean of group1 was set to 0.5 and the mean of group2 was set to 0.4, with SD within each group  $\sigma=0.1$ .



# ***Caenorhabditis elegans* locomotion is affected by internalized paramagnetic nanoparticles in the presence of magnetic field**

Eleni Gourgou<sup>1,2</sup>, Yang Zhang<sup>1,3</sup>, Ehsan Mirzakhali<sup>1</sup>, Bogdan Epureanu<sup>1, +</sup>

1. Mechanical Engineering, University of Michigan, Ann Arbor, MI, United States

2. Internal Medicine, Division of Geriatrics, Medical School, University of Michigan, Ann Arbor, MI, United States

3. Computer and Electronic Engineering, UM-SJTU Joint Institution, Shanghai JiaoTong University, Shanghai, China

+ corresponding author: Bogdan Epureanu, epureanu@umich.edu

## **Supplementary Information**

The features of the magnetic field (MF) presented here are independent of the magnetic particles and depend only on the properties of the electromagnets and the geometry of the setup. However, the forces that are exerted on the particles depend also on the properties of the particle. We have used several different magnetic particles in our experiments. The numerical simulations and analysis are performed only on the largest magnetic particles since such analysis provide us with the largest forces that can be created because of the external MF. Moreover, the characteristics of Dynabeads are more accessible (Fonnum et al., 2005) compared to the rest of the particles used in our experiments.

The forces on a magnetic particle in an external MF can be characterized as (Shevkoplyas et al., 2007):

$$\mathbf{F} = \rho V \nabla (\mathbf{M}_0 \cdot \mathbf{B}) + \frac{V \chi_{bead}}{\mu_0} (\mathbf{B} \cdot \nabla) \mathbf{B}, \quad (1)$$

where  $\rho$ ,  $V$ ,  $M_0$ ,  $\chi_{bead}$  are the density, volume, initial magnetization, and initial magnetic susceptibility of the particles, respectively.  $\mathbf{F}$  is the force acting on the particle,  $\mathbf{B}$  is the external MF, and  $\mu_0$  is the permeability of vacuum.

Equation (1) is used with the properties of the magnetic particles (Fonnum et al., 2005) and the simulation results from COMSOL Multiphysics for the external MF to calculate the forces acting on the magnetic particles. Figure 2 shows that the magnitude of the force at all locations on the plate, which, as expected, can be observed to be larger near the electromagnets where the MF and its gradient are larger.

The magnetization of the particles creates local modifications to the MF compared to the externally applied MF. From classical physics, the MF around a magnetic dipole can be expressed as:

$$\mathbf{B}(\mathbf{r}) = \frac{\mu_0}{4\pi} \left( \frac{3\mathbf{r}(\mathbf{M} \cdot \mathbf{r})}{r^5} - \frac{\mathbf{M}}{r^3} \right), \quad (2)$$

where  $\mathbf{r}$  is position vector relative to the particle at which the MF is calculated and  $\mathbf{M}$  is the magnetic moment of the particle that can be calculated as (Shevkopyas et al., 2007):

$$\mathbf{M} = \mathbf{M}_0 + \frac{\chi_{bead}}{\rho} \frac{\mathbf{B}_{external}}{\mu_0}. \quad (3)$$

Equation (3) is used with the properties of the largest particles in our experiments (Fonnum et al., 2005) along with the external MF ( $\mathbf{B}_{external}$ ) created by the electromagnets obtained from COMSOL Multiphysics to determine the magnetic moments of the particles in the presence of the external MF. Next Eq. (2) is used to calculate the MF around the particles when the magnetic moment is known. Figure 3 shows the magnitude of the MF flux for vertical and horizontal configuration of three magnetic particles using Eqs. (2) and (3) in MATLAB. The MF is strong close to the particles for both configurations, and decays rapidly with distance from the particles.

The MF shown in Figure 3 can also be used to calculate the gradient of the MF around the particles. Figure 3 show the gradient of the magnetic of for both horizontal and vertical configuration. Again, the gradient of the MF is strongest near the particles and decays rapidly with distance from the particles.

Finally, the forces between two magnetic particles can be found as (3):

$$\mathbf{F}_{12} = -\frac{3\mu_0 M^2}{4\pi r_{12}^4} \left( -(\mathbf{n}_1 \cdot \mathbf{n}_2) \mathbf{t}_{12} - (\mathbf{n}_2 \cdot \mathbf{t}_{12}) \mathbf{n}_1 - (\mathbf{n}_1 \cdot \mathbf{t}_{12}) \mathbf{n}_2 + 5(\mathbf{n}_1 \cdot \mathbf{t}_{12})(\mathbf{n}_2 \cdot \mathbf{t}_{12}) \mathbf{t}_{12} \right) \quad (4)$$

where  $\mathbf{F}_{12}$  is the force between the two particles,  $r_{12}$  is the distance between the two particles,  $\mathbf{t}_{12}$  is the unit vector that connects the two particles,  $\mathbf{n}_1$  and  $\mathbf{n}_2$  are the direction of the magnetic moment for particle 1 and 2, and  $M$  is the magnitude of the magnetic moment of the two

particles. Here, we have assumed that the distance between the two particles is small leading to the same magnetic moment for both particles based on Eq. (3). Figure 3E shows how the force between two particles changes for both vertical and horizontal direction. The force between the particles in the horizontal direction is repulsive while the force between the particles in the vertical direction is attractive. The attractive forces between the particles cause them to form chain-like structures when they are not interrupted by the medium in which the particles are located (Mirzakhali et al., 2017; Nakata et al., 2008).

### Comparison of the MF/gradient MF between particles

We compare the MF and gradient of MF between the particles based on their size. The iron mass of an ideal spherical particle scales with  $d^3$ , where  $d$  is the diameter of the particle. Hence, for constant density, smaller particles have smaller magnetic mass by a factor of  $d^{-3}$ . However, according to Eq. 2 in the Supplementary Information, the MF around a particle scales with  $r^{-3}$ , where  $r$  is the distance from the center of the particle. Therefore, the MF on the surface of a particle changes with its size. Smaller particles have less magnetic material, so their MF in the proximity of the particle is smaller. In addition, the gradient of MF scales with  $r^{-4}$ . Hence, since the mass of the magnetic core scales with  $d^{-3}$ , the gradient of MF on the surface of the particle scales with  $d$ . Therefore, smaller particles will have larger gradient of MF compared to larger particles in their proximity.

### References

- Fonnum, G., Johansson, C., Molteberg, A., Mørup, S. & Aksnes, E. 2005. Characterisation of Dynabeads® by magnetization measurements and Mössbauer spectroscopy. *Journal of Magnetism and Magnetic Materials*, 293, 41-47.
- Mirzakhali, E., Nam, W. & Epureanu, B. I. 2017. Reduced-order models for the dynamics of superparamagnetic nanoparticles interacting with cargoes transported by kinesins. *Nonlinear Dynamics*, 90, 425-442.
- Nakata, K., Hu, Y., Uzun, O., Bakr, O. & Stellacci, F. 2008. Chains of Superparamagnetic Nanoparticles. *Advanced Materials*, 20, 4294-4299.

Shevkoplyas, S. S., Siegel, A. C., Westervelt, R. M., Prentiss, M. G. & Whitesides, G. M. 2007. The force acting on a superparamagnetic bead due to an applied magnetic field. *Lab Chip*, 7, 1294-302.
